# Supplementary material
Source: PubMed Central journal article supplement (PMC5900329)
Supplement: ml7b00548_si_002.pdf [file ml7b00548_si_002.pdf]

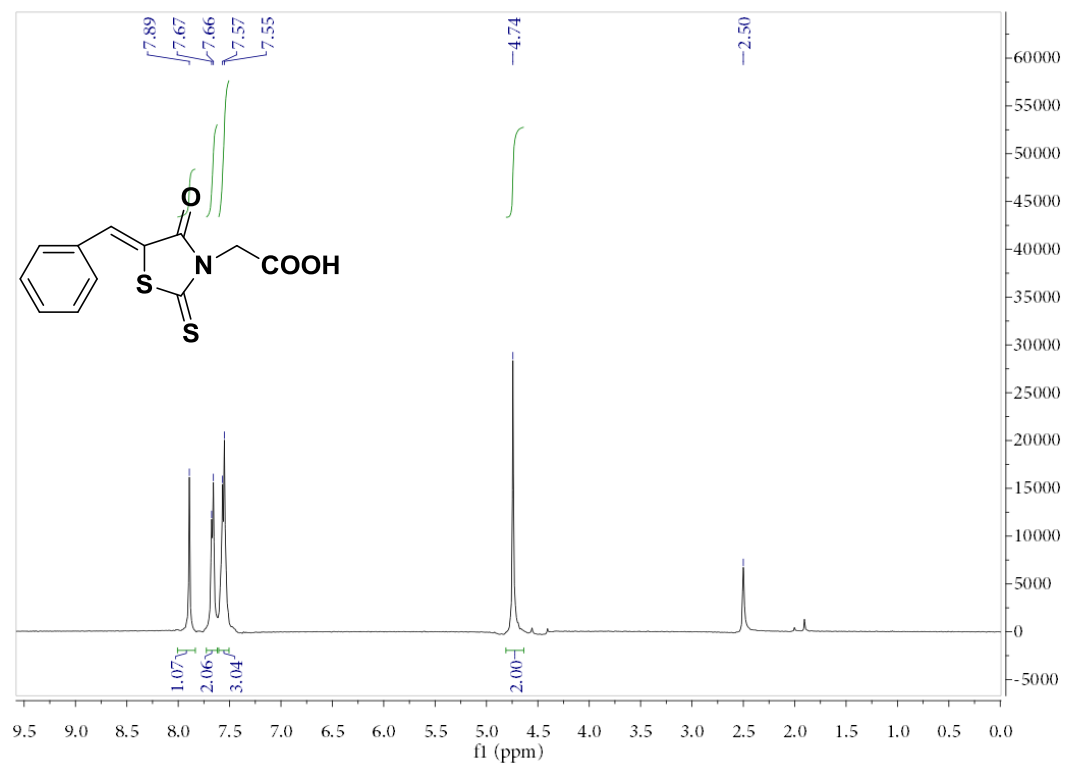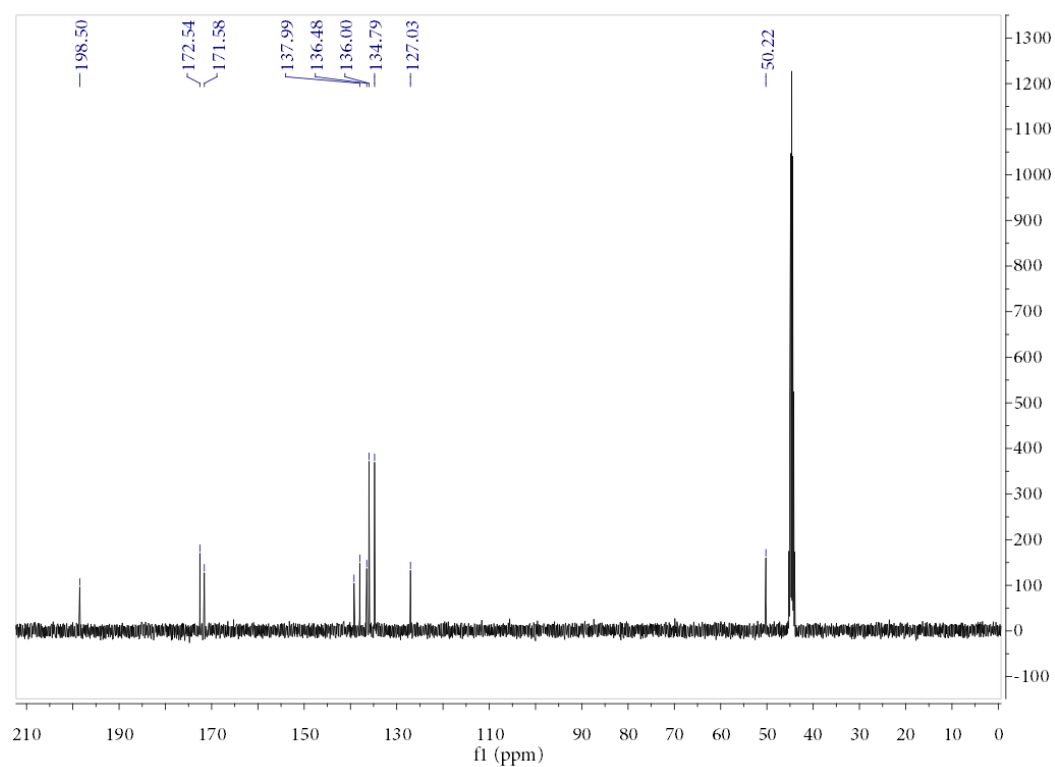

The spectra of <sup>1</sup>H and <sup>13</sup>C NMR of compound 1a

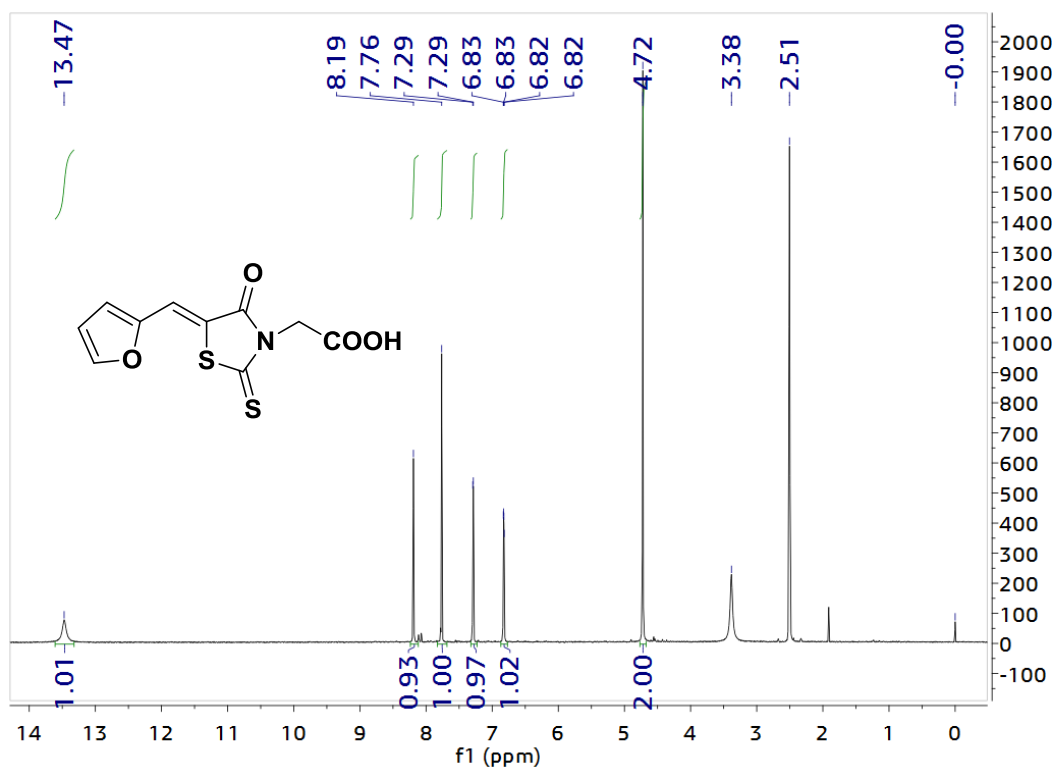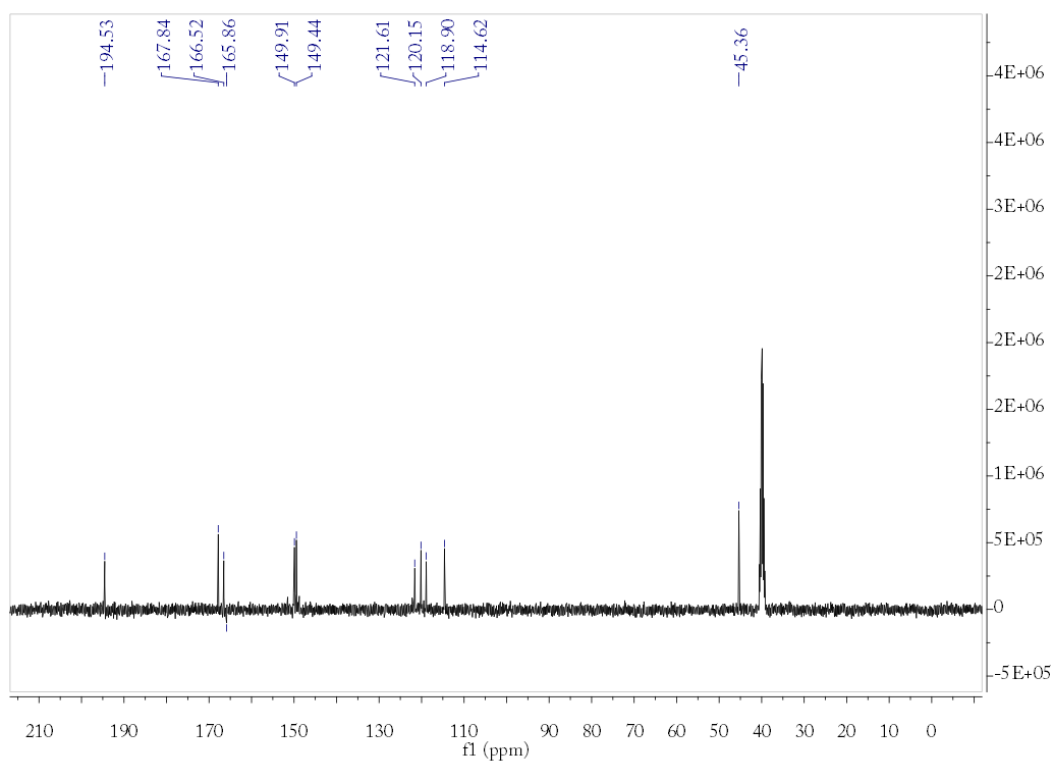

The spectra of <sup>1</sup>H and <sup>13</sup>C NMR of compound 1b

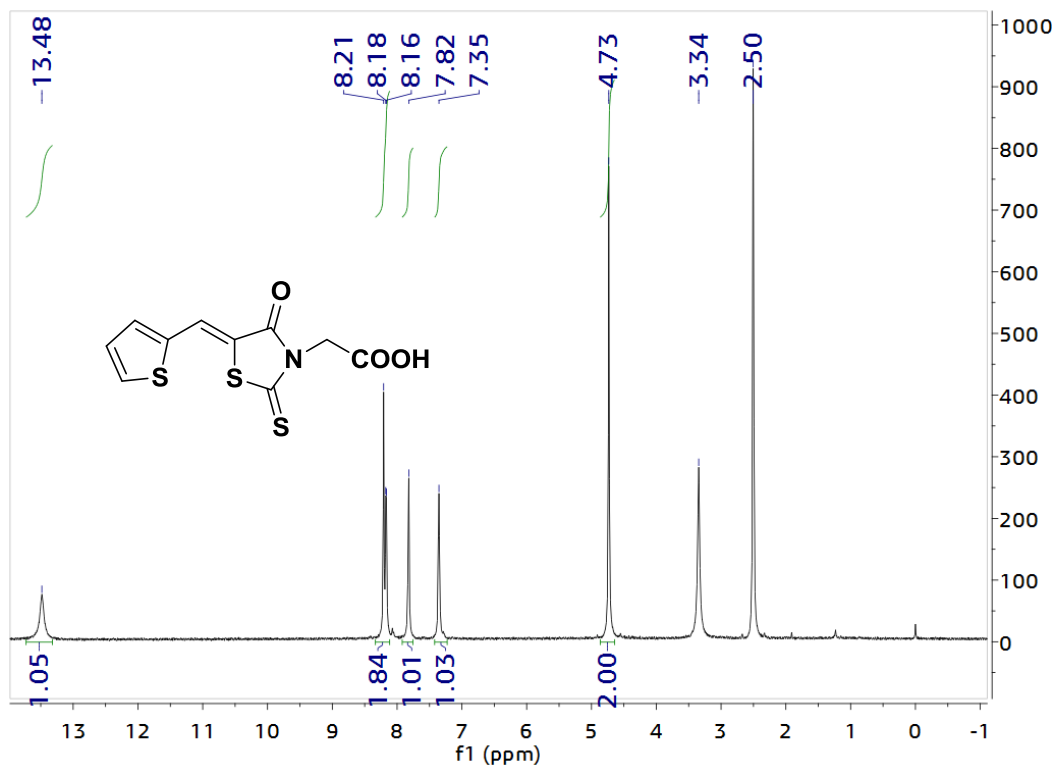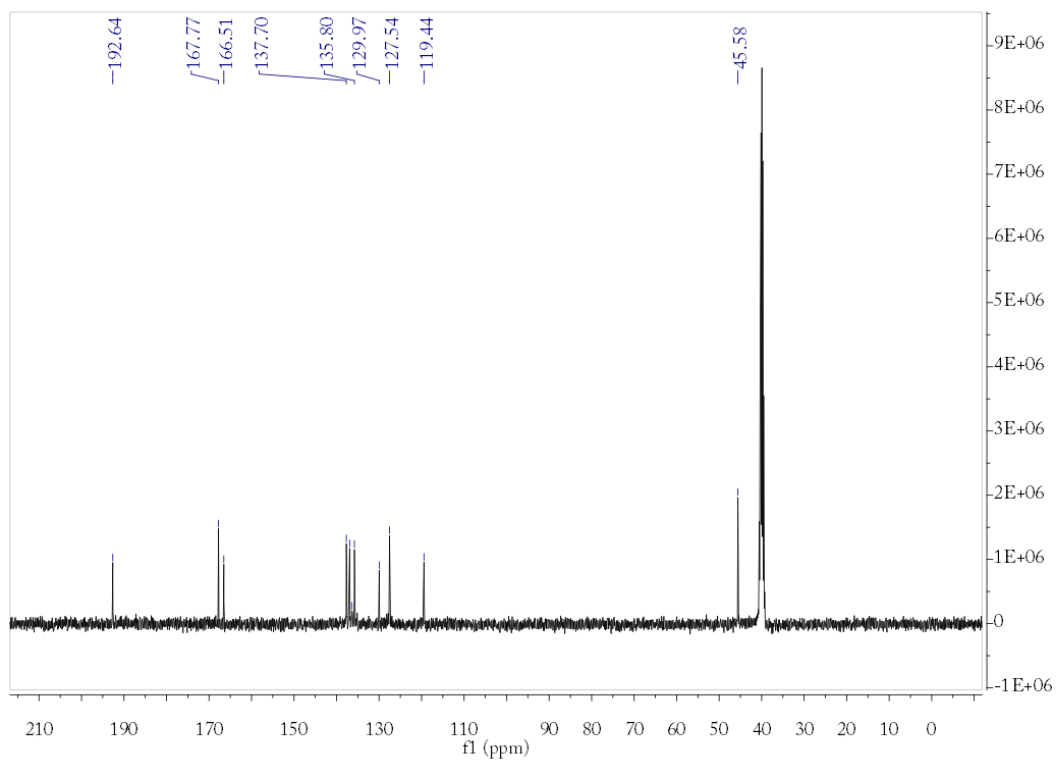

The spectra of <sup>1</sup>H and <sup>13</sup>C NMR of compound 1c

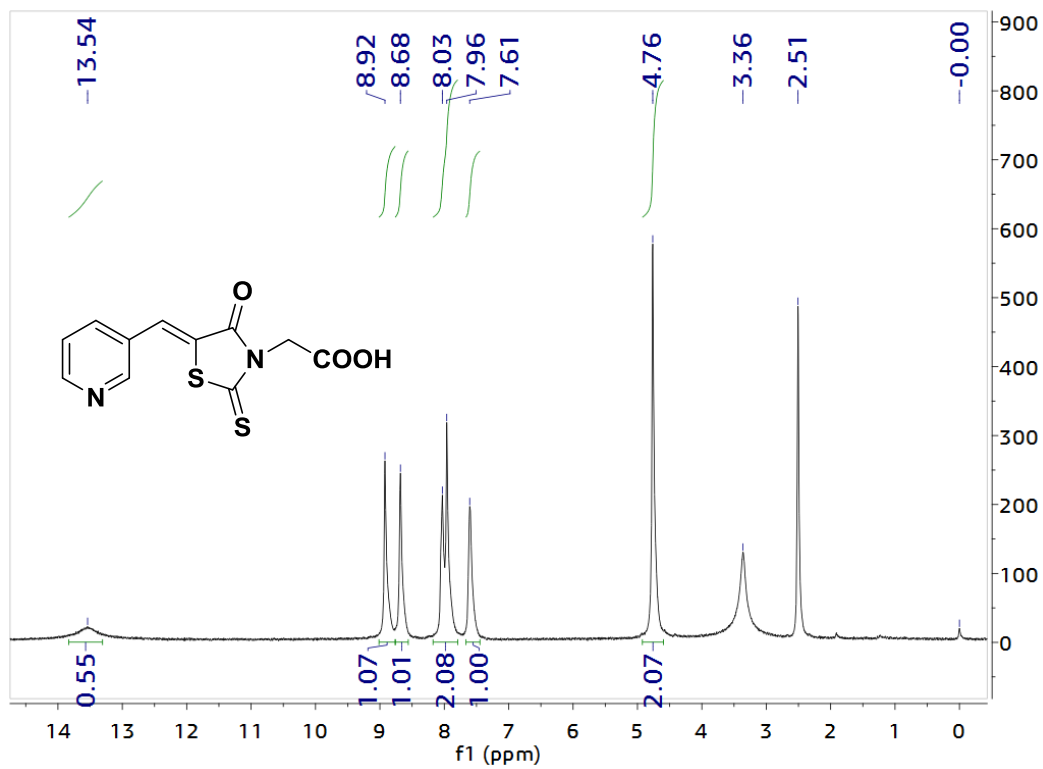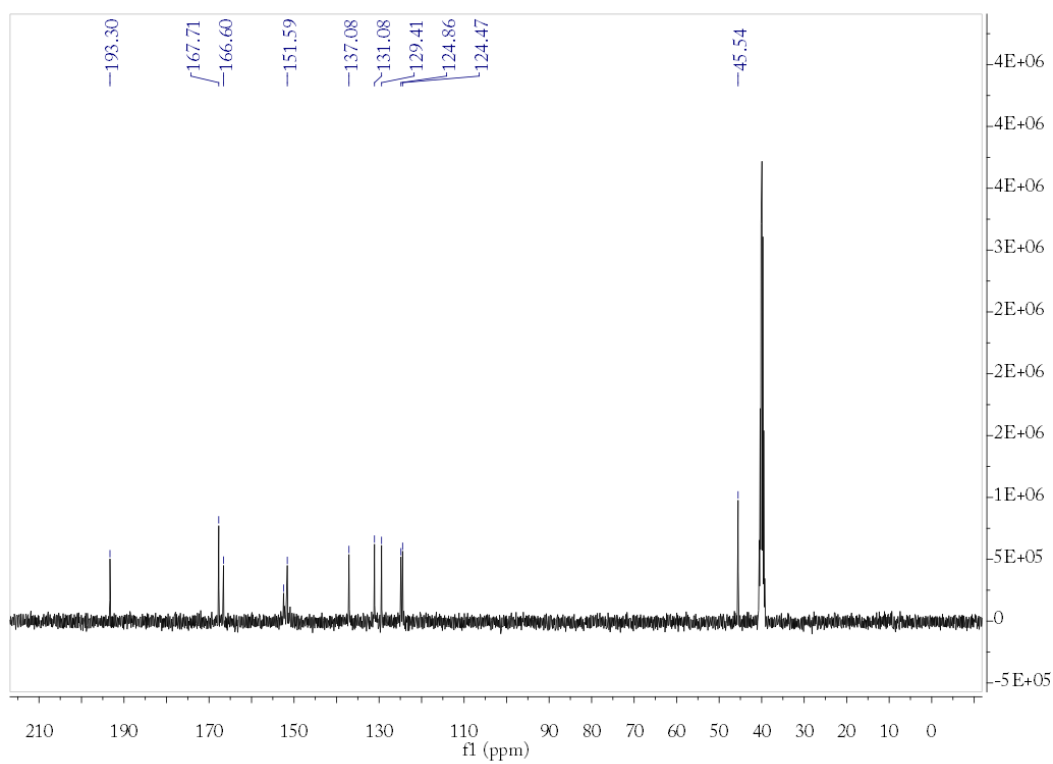

The spectra of  $^1\text{H}$  and  $^{13}\text{C}$  NMR of compound **1d**

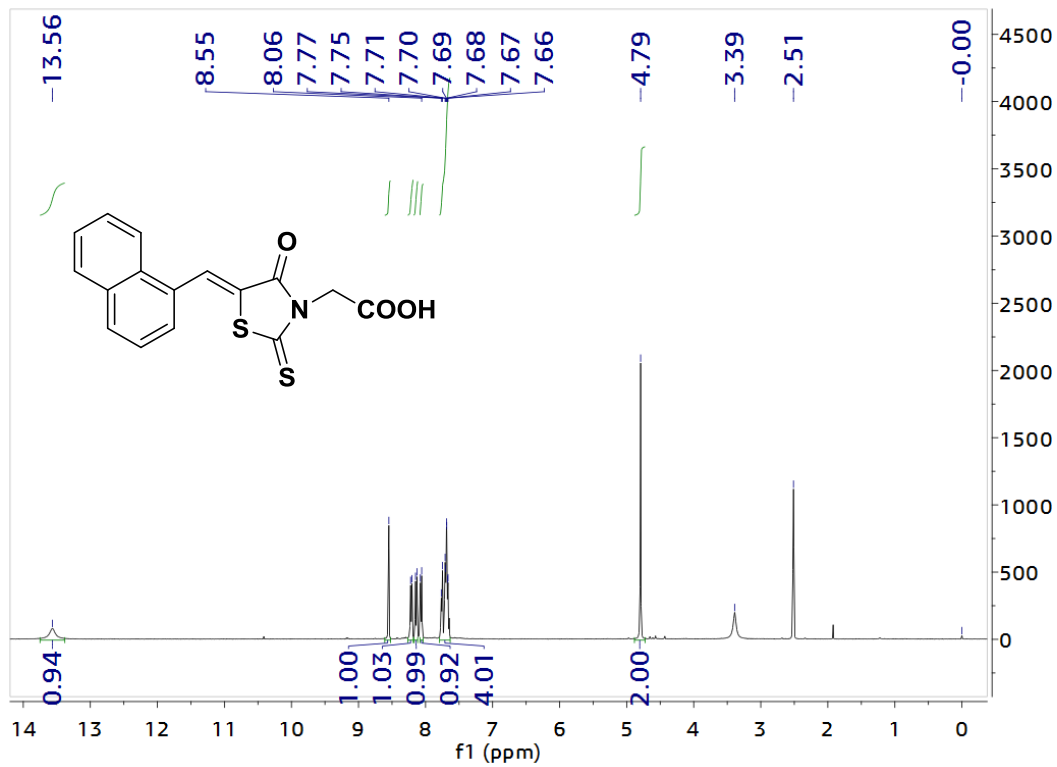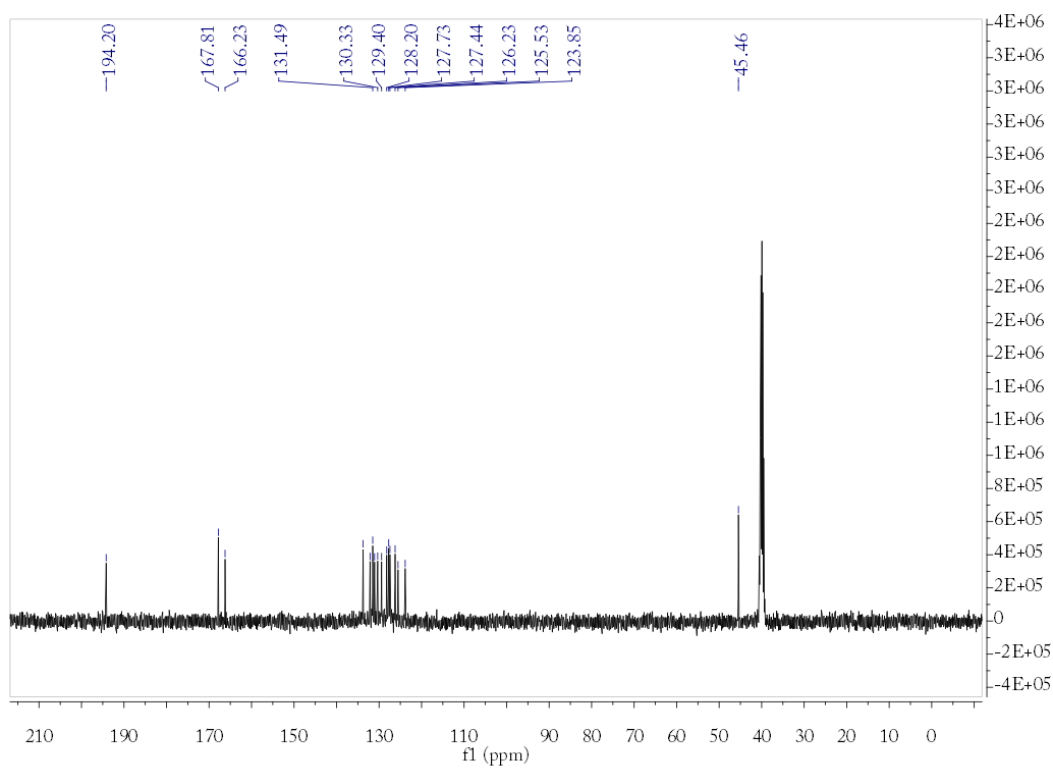

The spectra of  $^1\text{H}$  and  $^{13}\text{C}$  NMR of compound **1e**

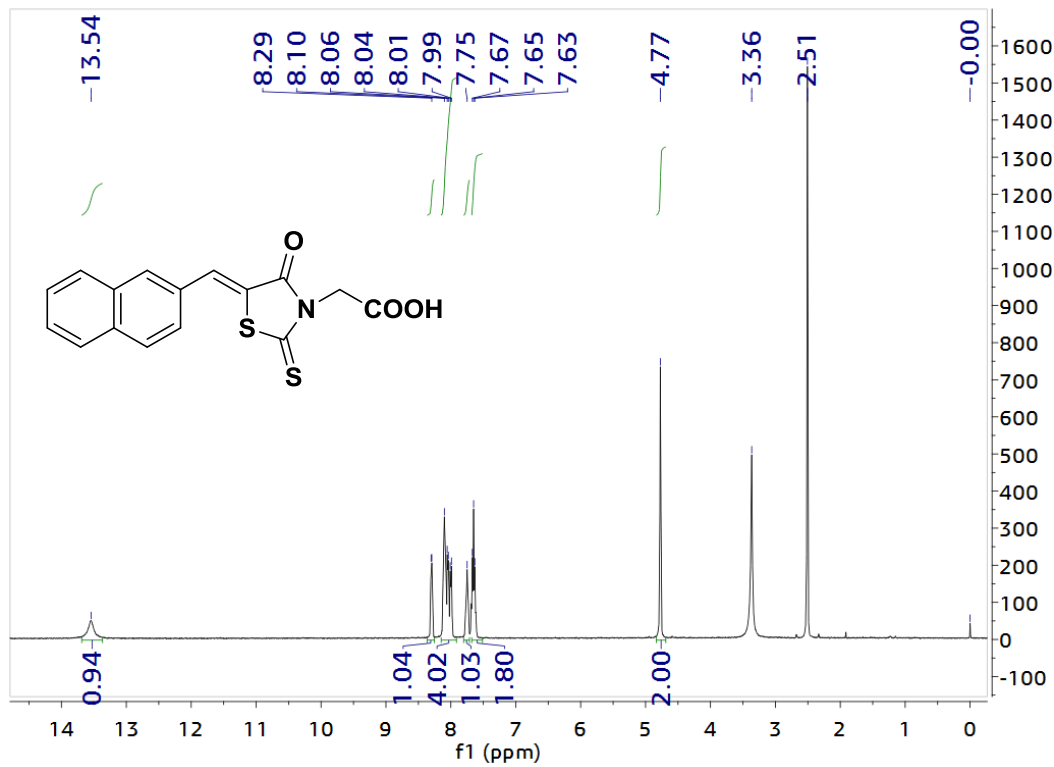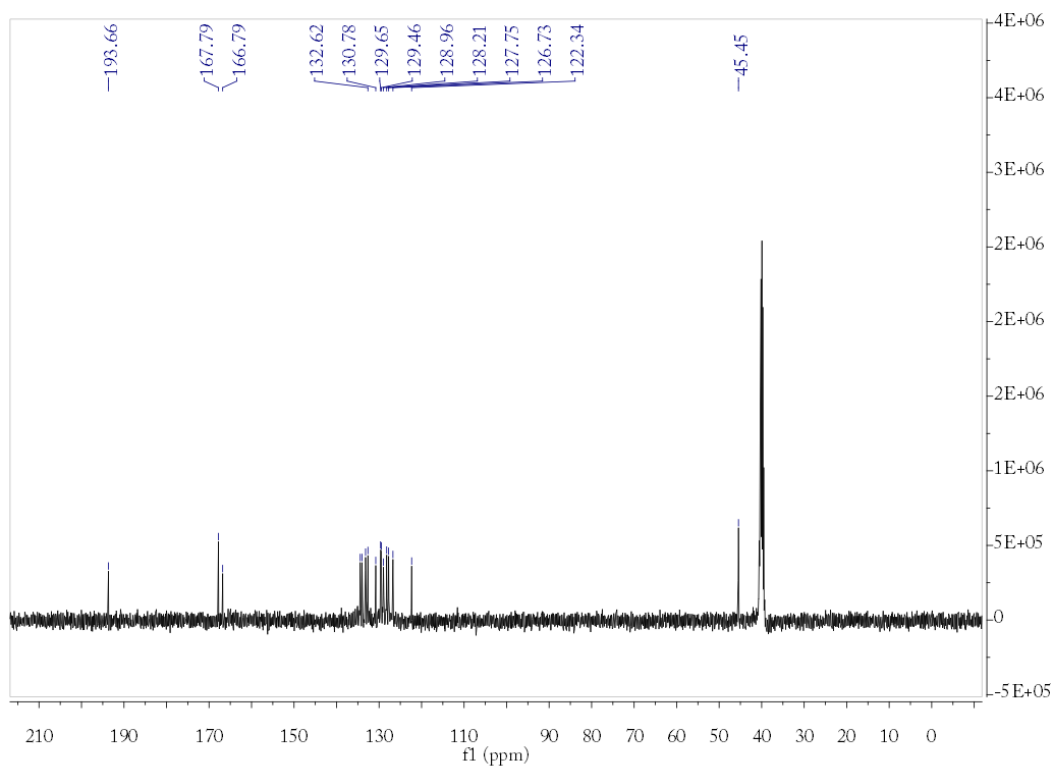

The spectra of  $^1\text{H}$  and  $^{13}\text{C}$  NMR of compound **1f**

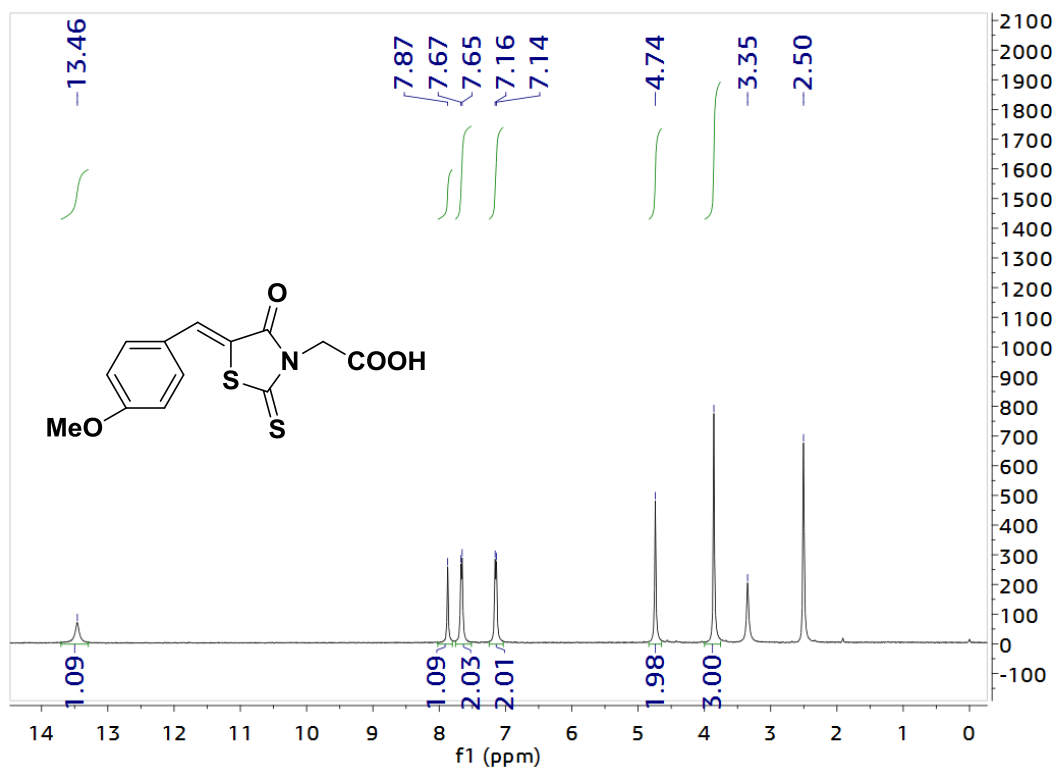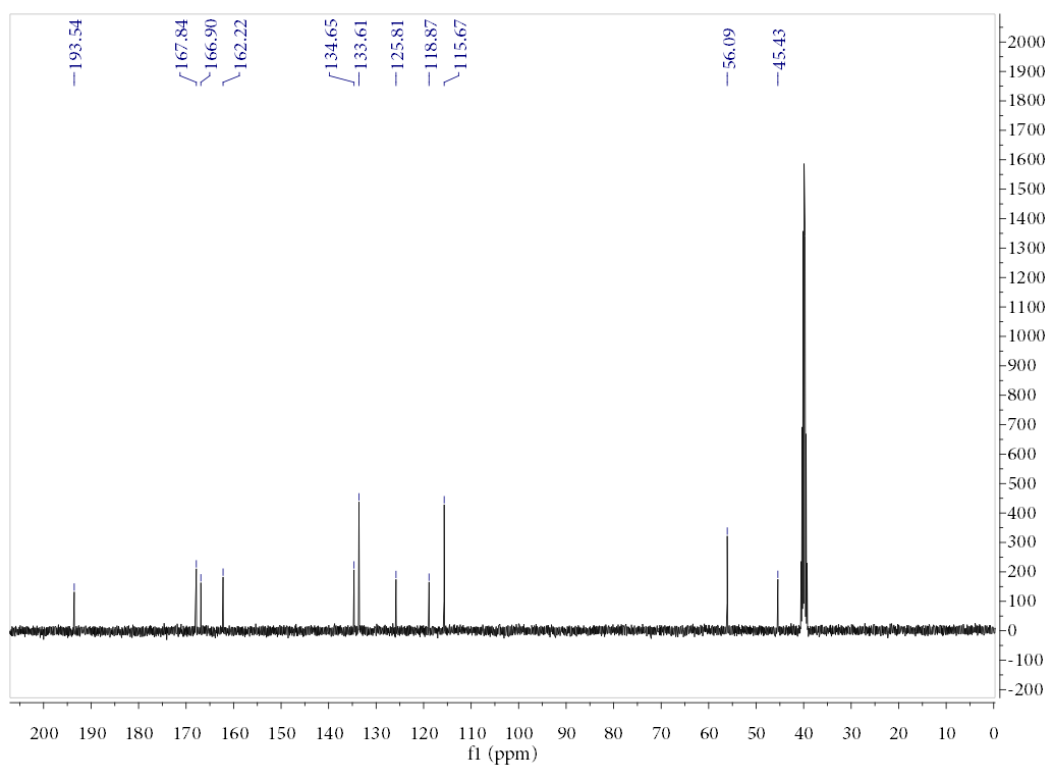

The spectra of  $^1\text{H}$  and  $^{13}\text{C}$  NMR of compound **1g**

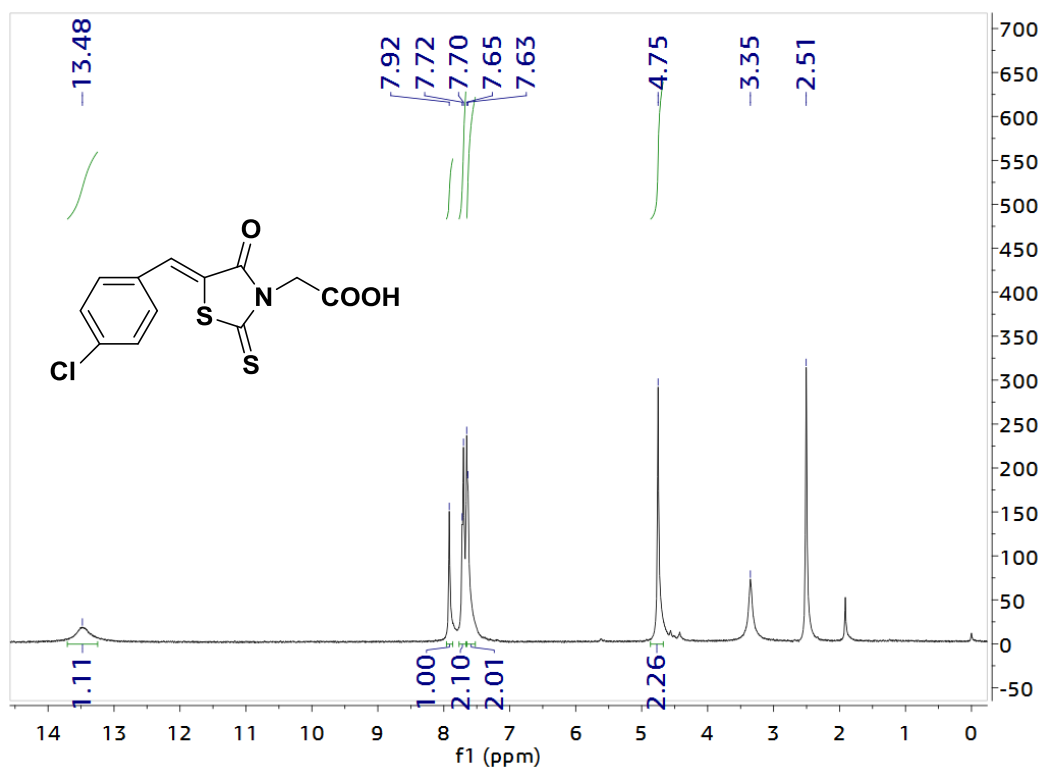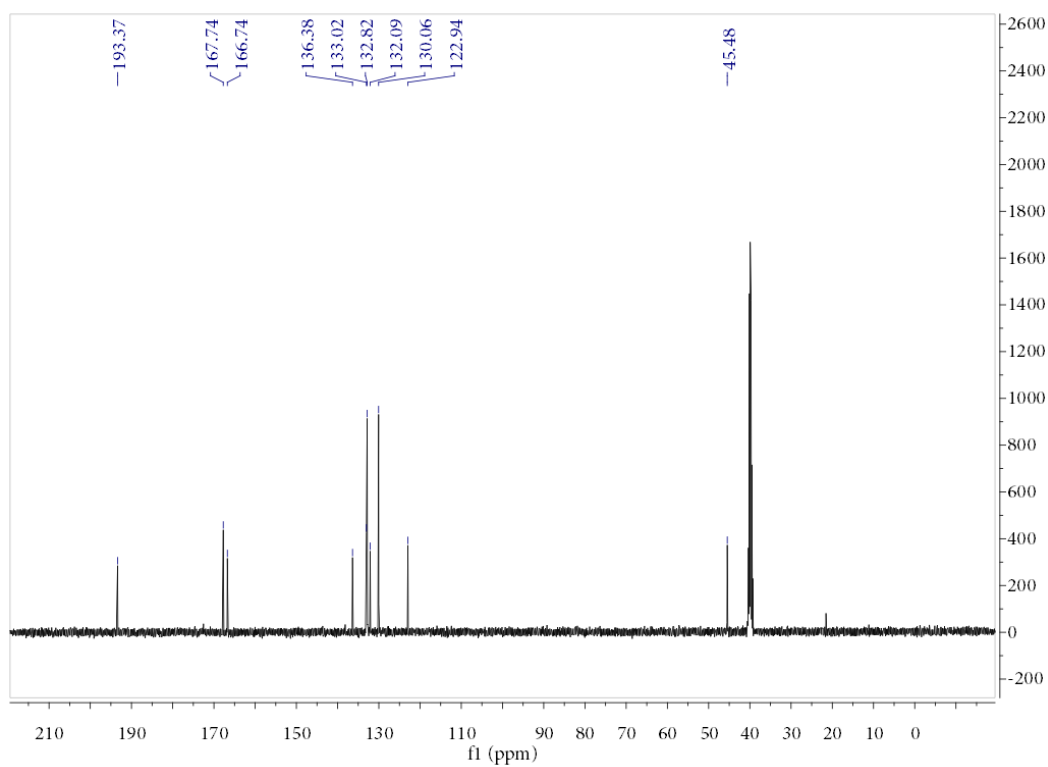

The spectra of  $^1\text{H}$  and  $^{13}\text{C}$  NMR of compound **1h**



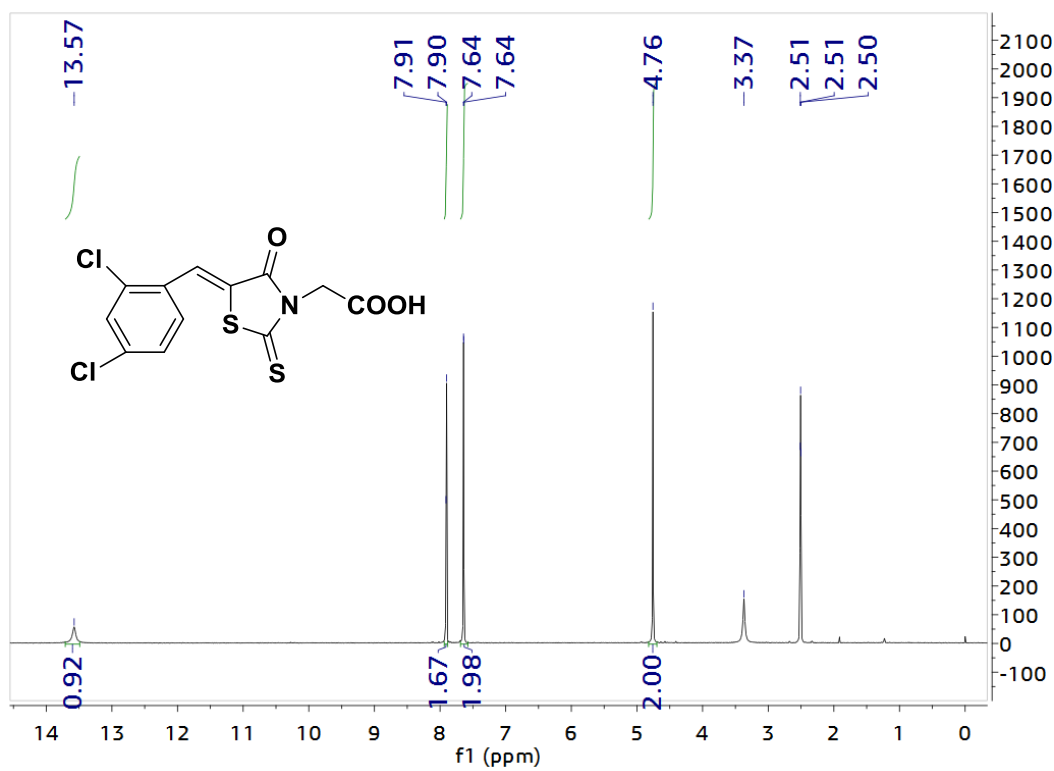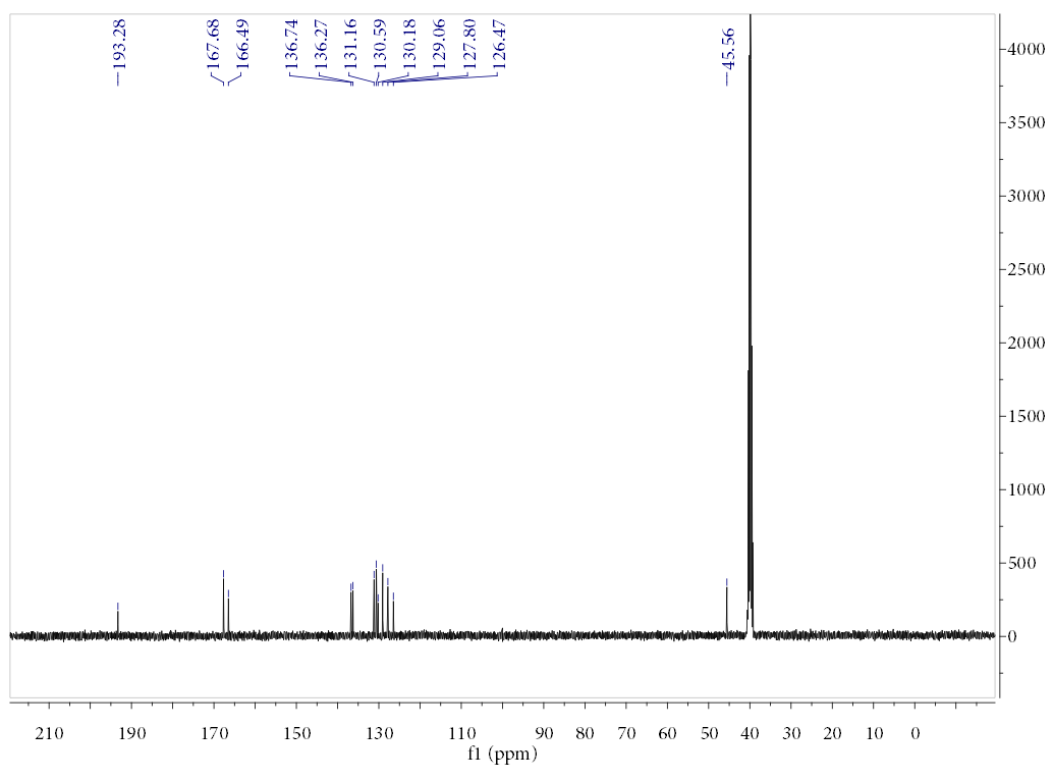

The spectra of  $^1\text{H}$  and  $^{13}\text{C}$  NMR of compound **1i**

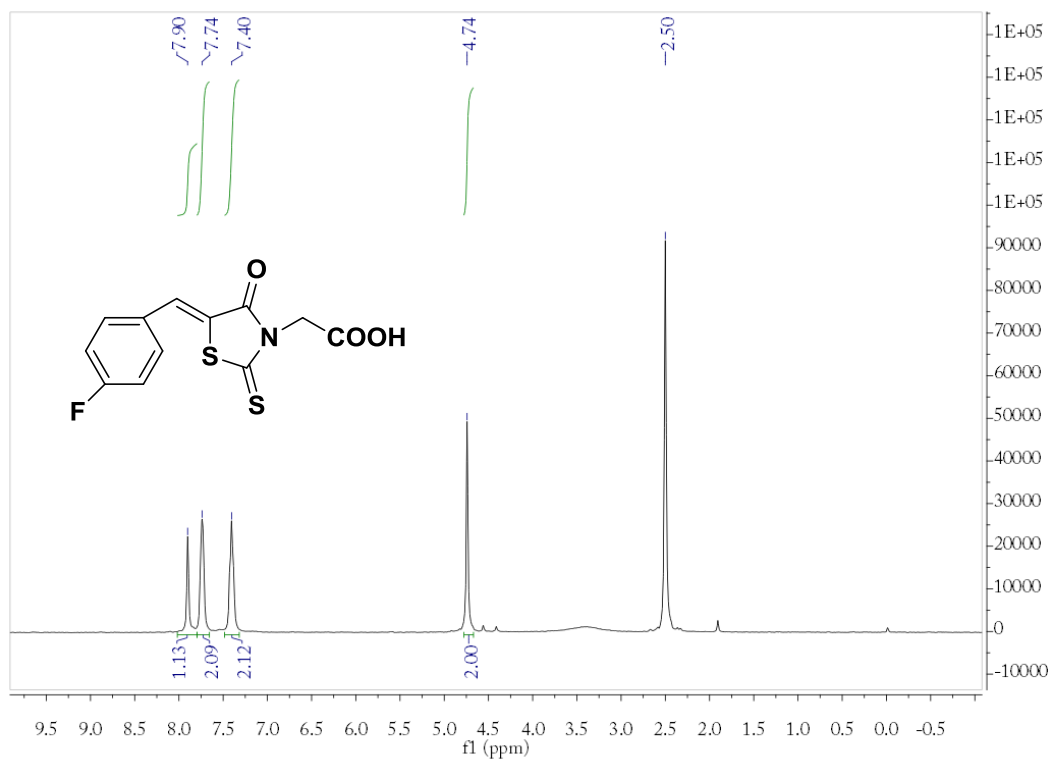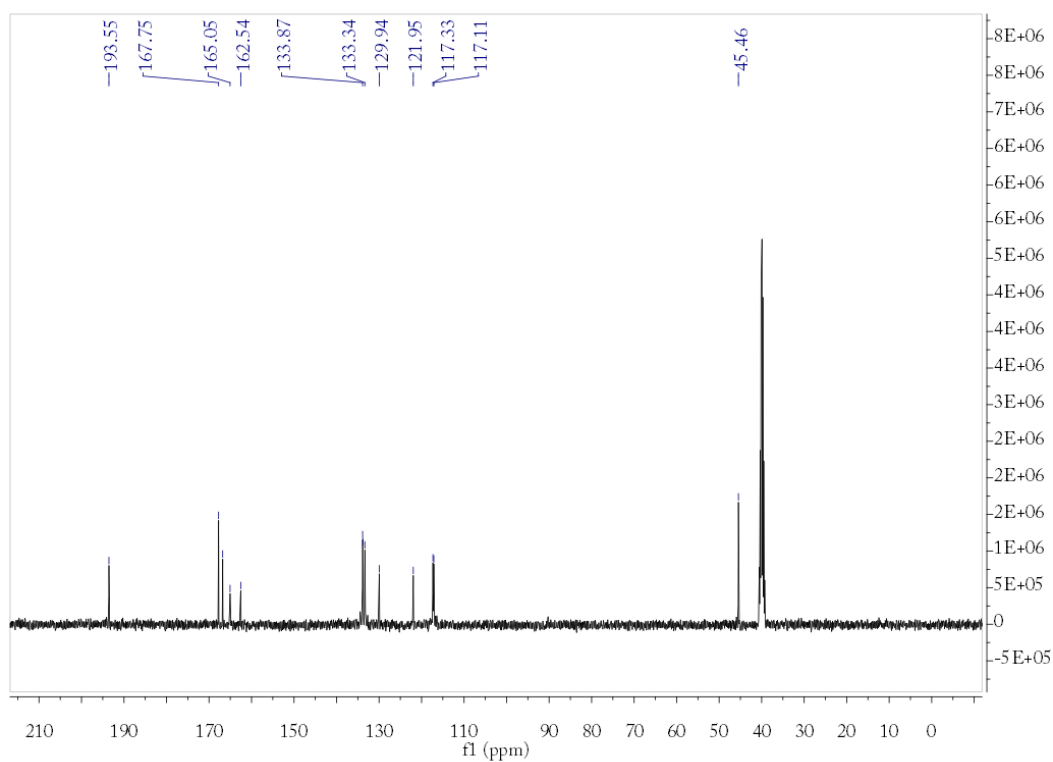

The spectra of <sup>1</sup>H and <sup>13</sup>C NMR of compound 1j

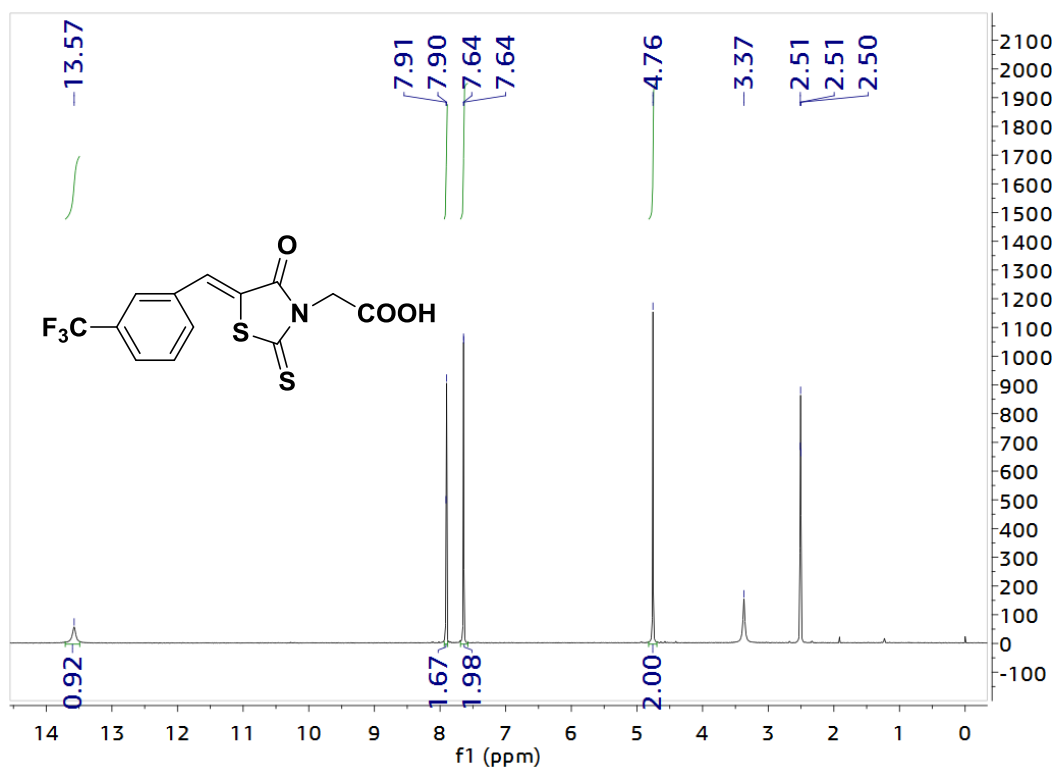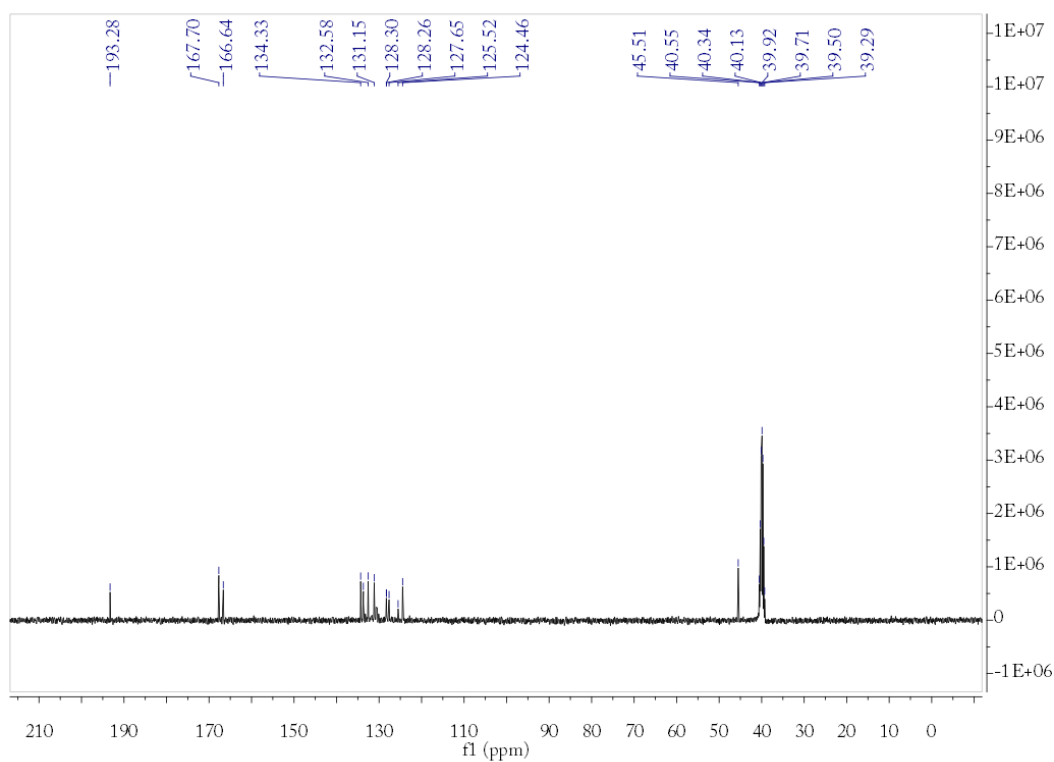

The spectra of  $^1\text{H}$  and  $^{13}\text{C}$  NMR of compound **1k**

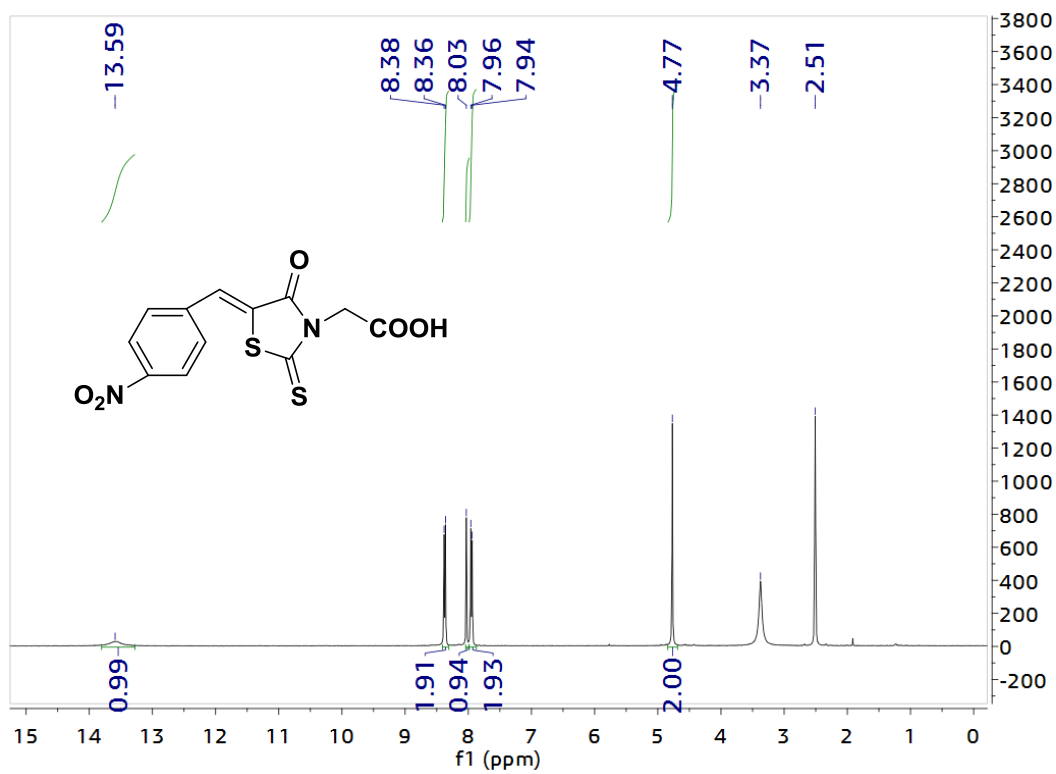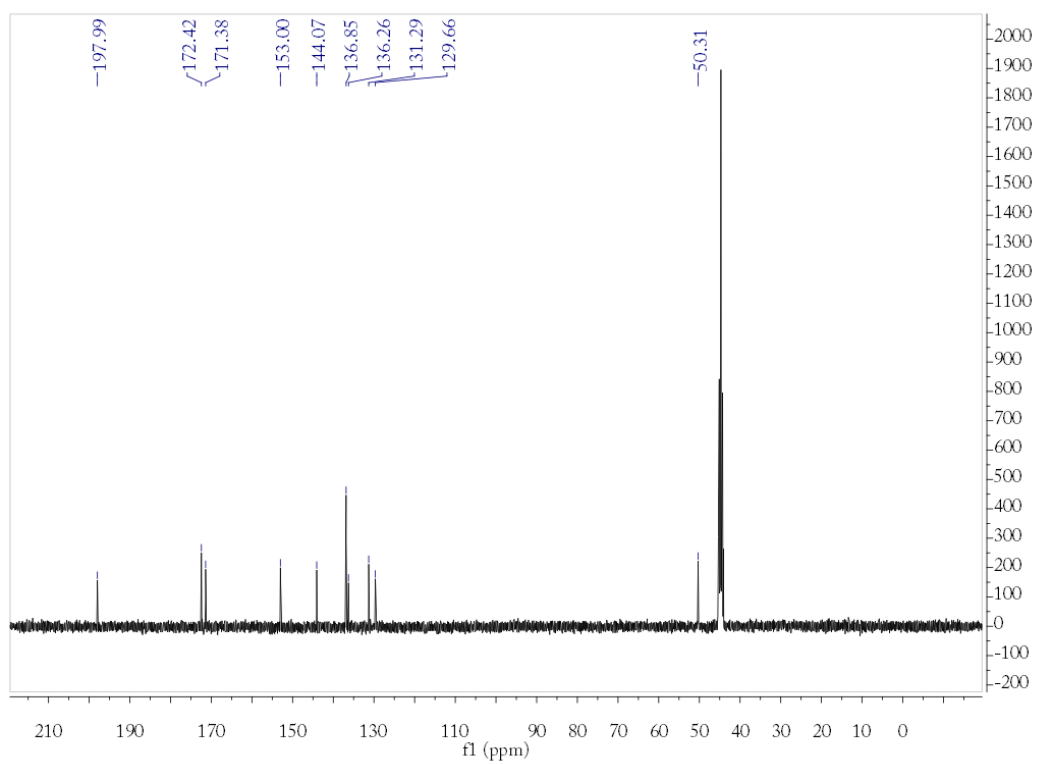

The spectra of  $^1\text{H}$  and  $^{13}\text{C}$  NMR of compound **11**

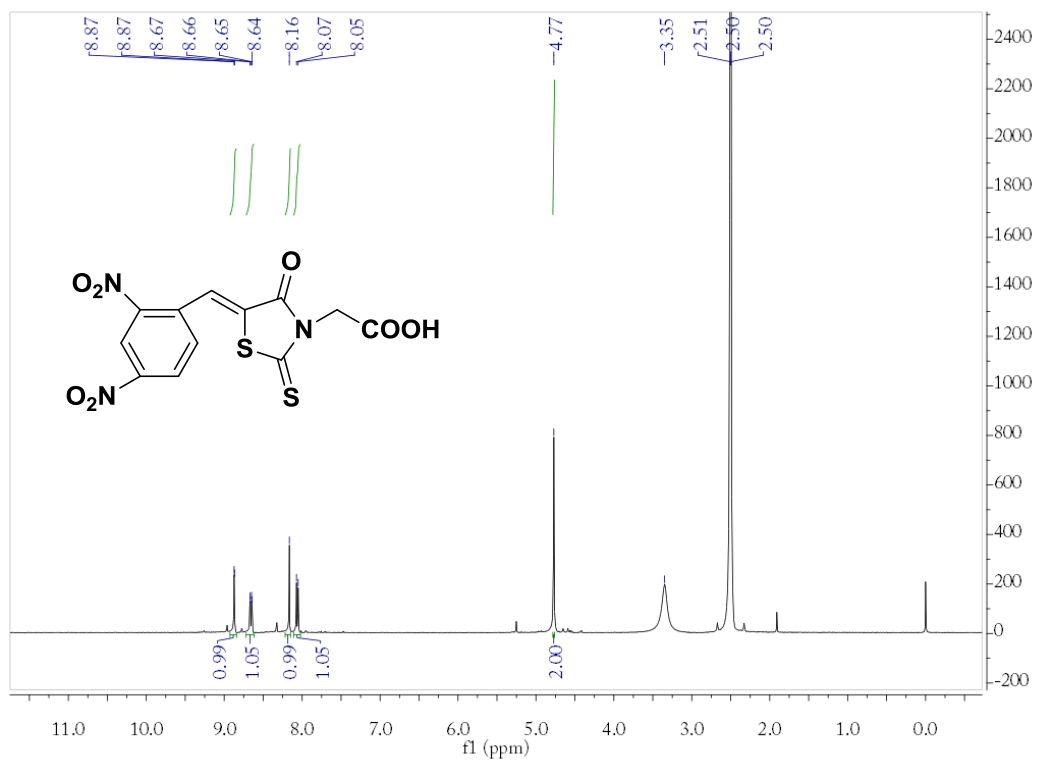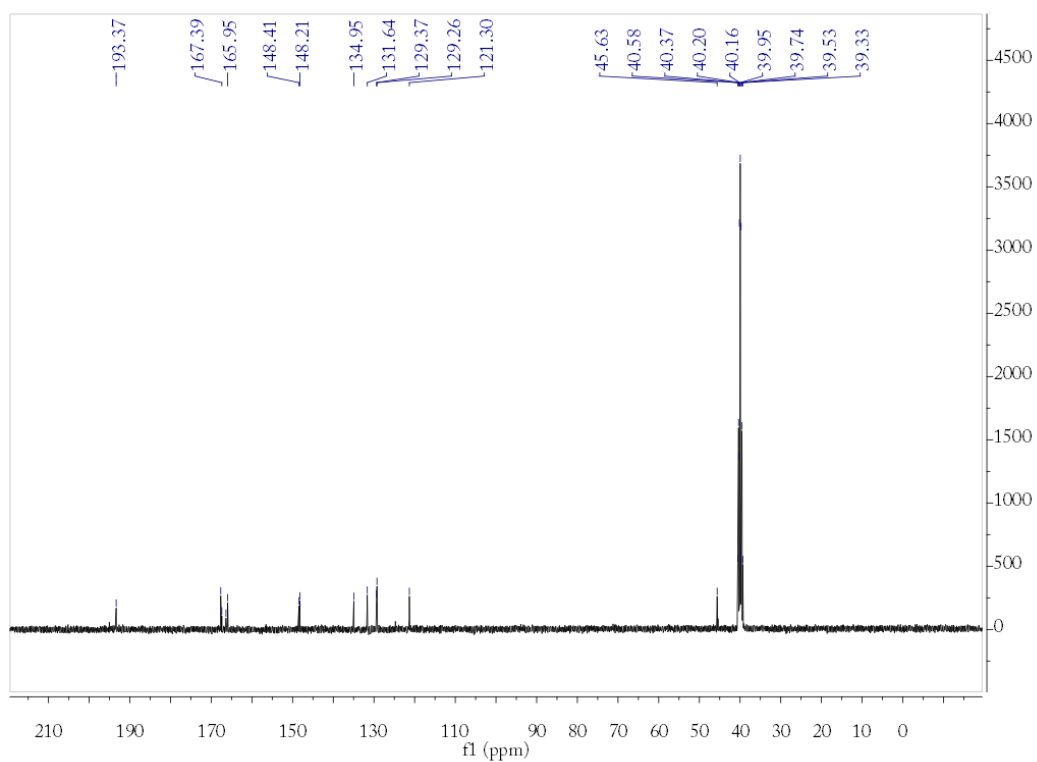

The spectra of <sup>1</sup>H and <sup>13</sup>C NMR of compound **1m**

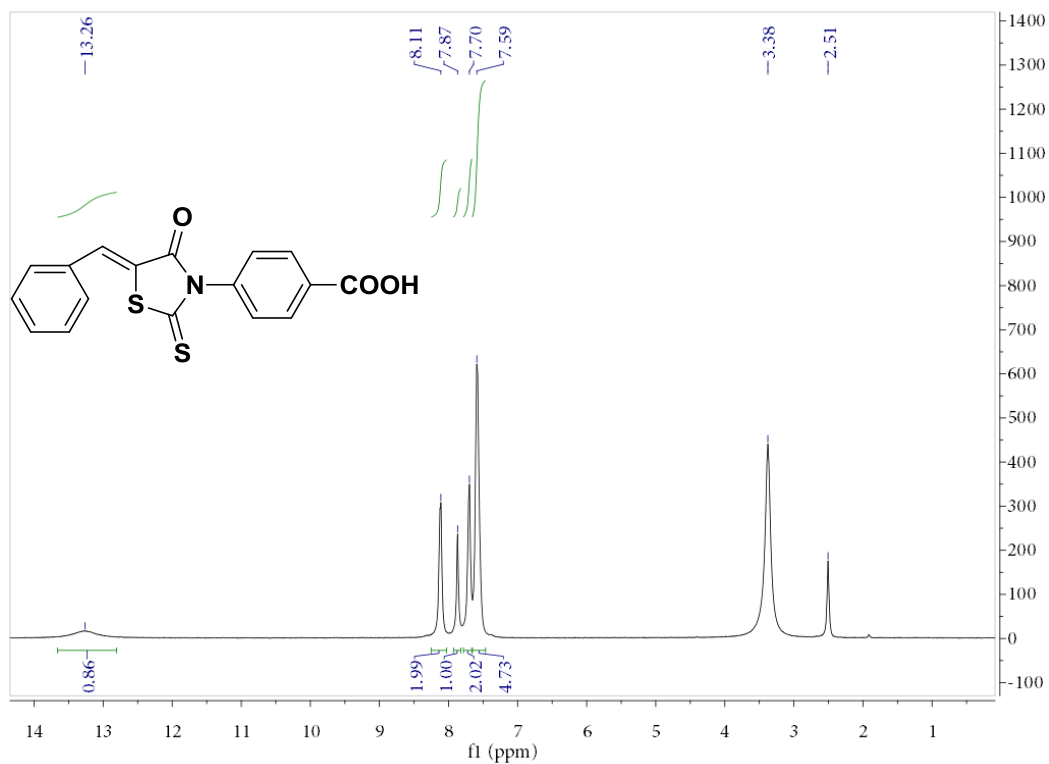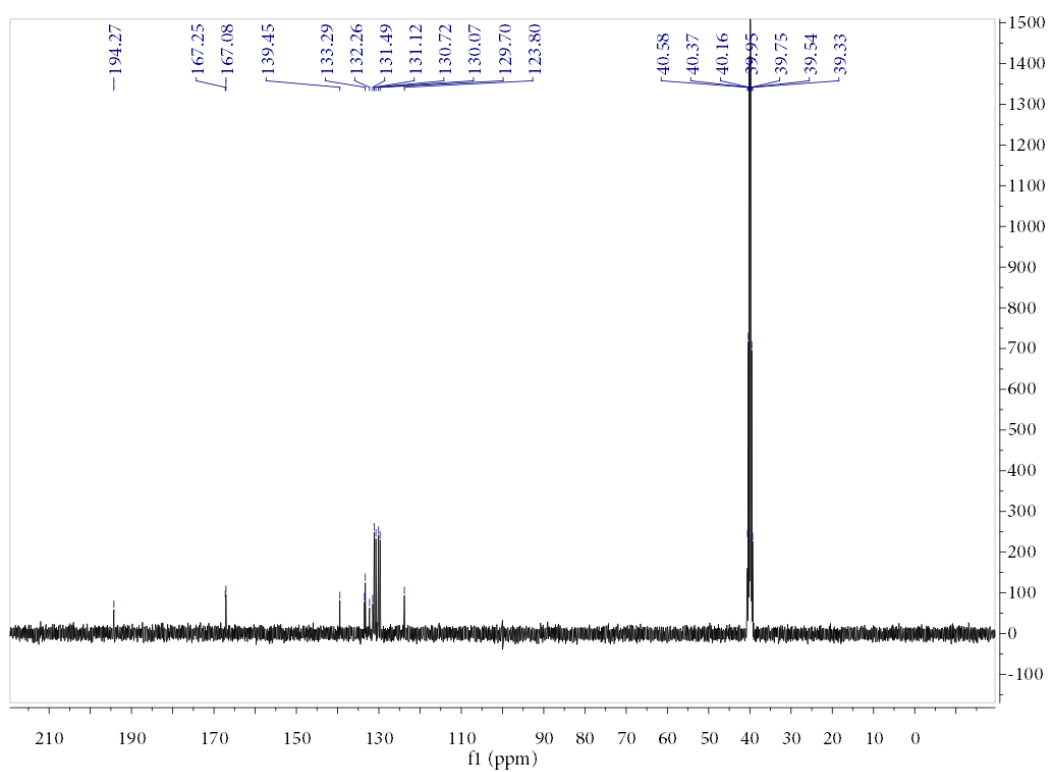

The spectra of  $^1\text{H}$  and  $^{13}\text{C}$  NMR of compound 2a

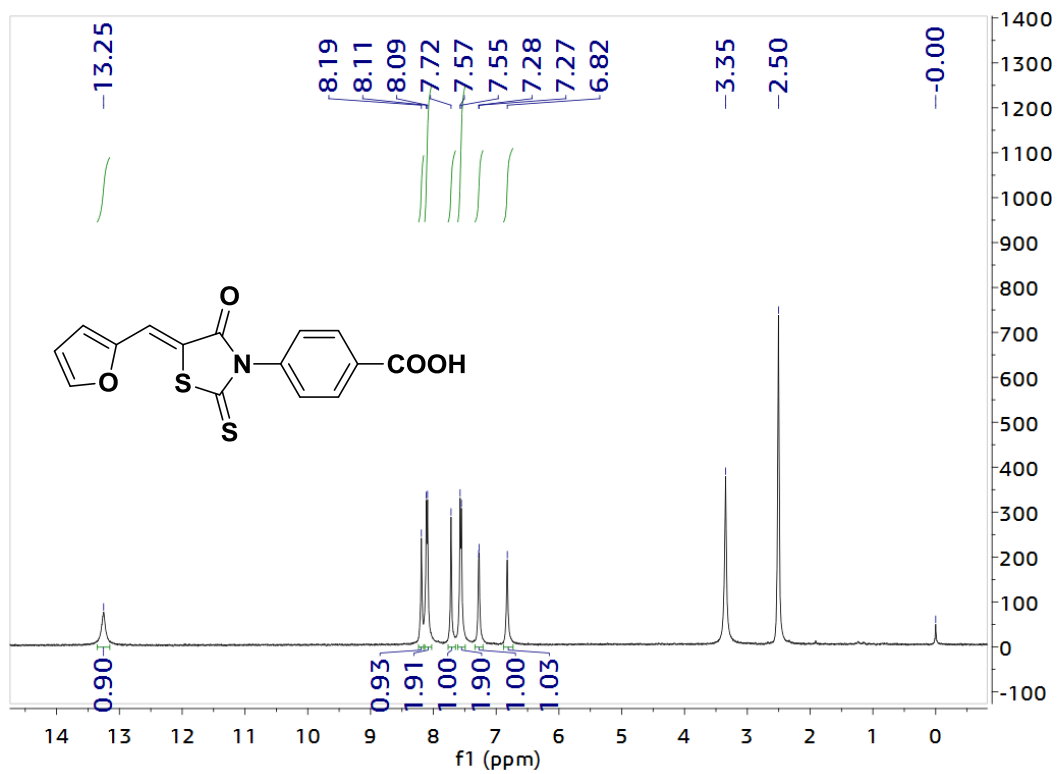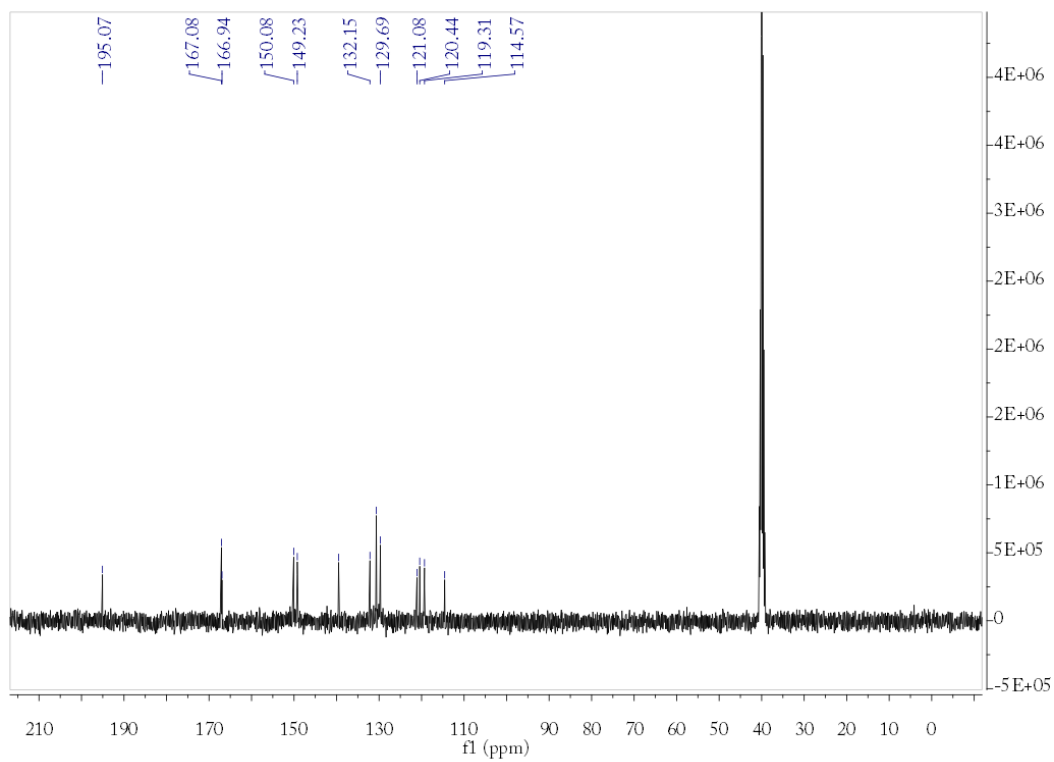

The spectra of  $^1\text{H}$  and  $^{13}\text{C}$  NMR of compound **2b**

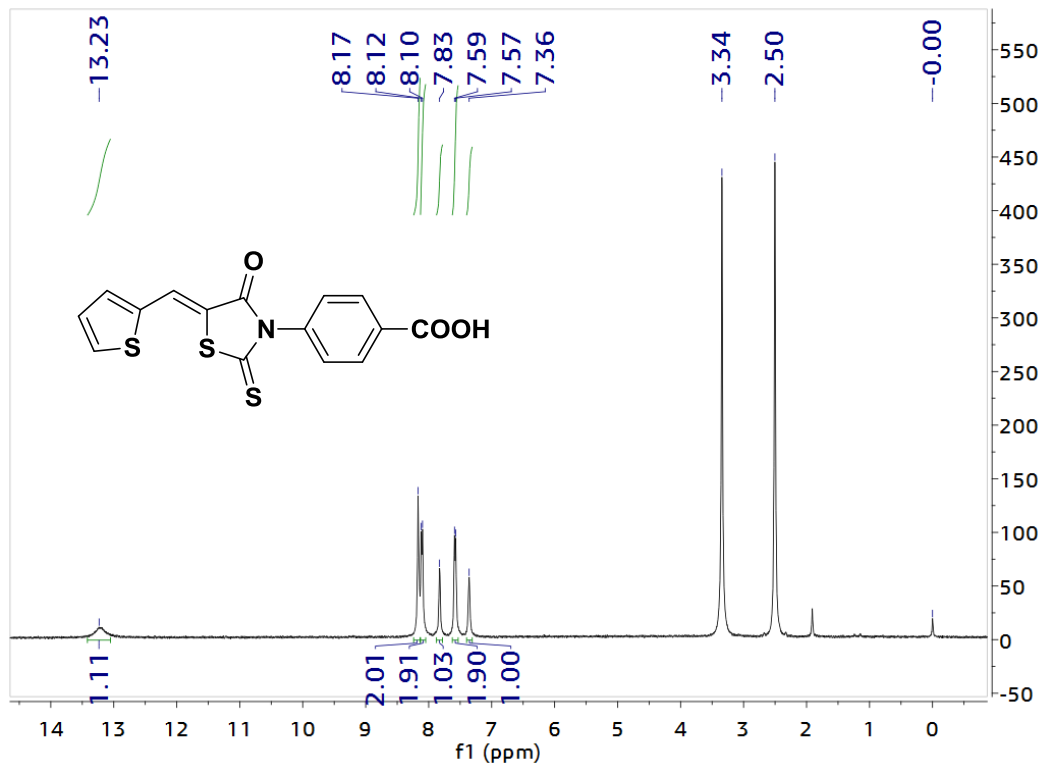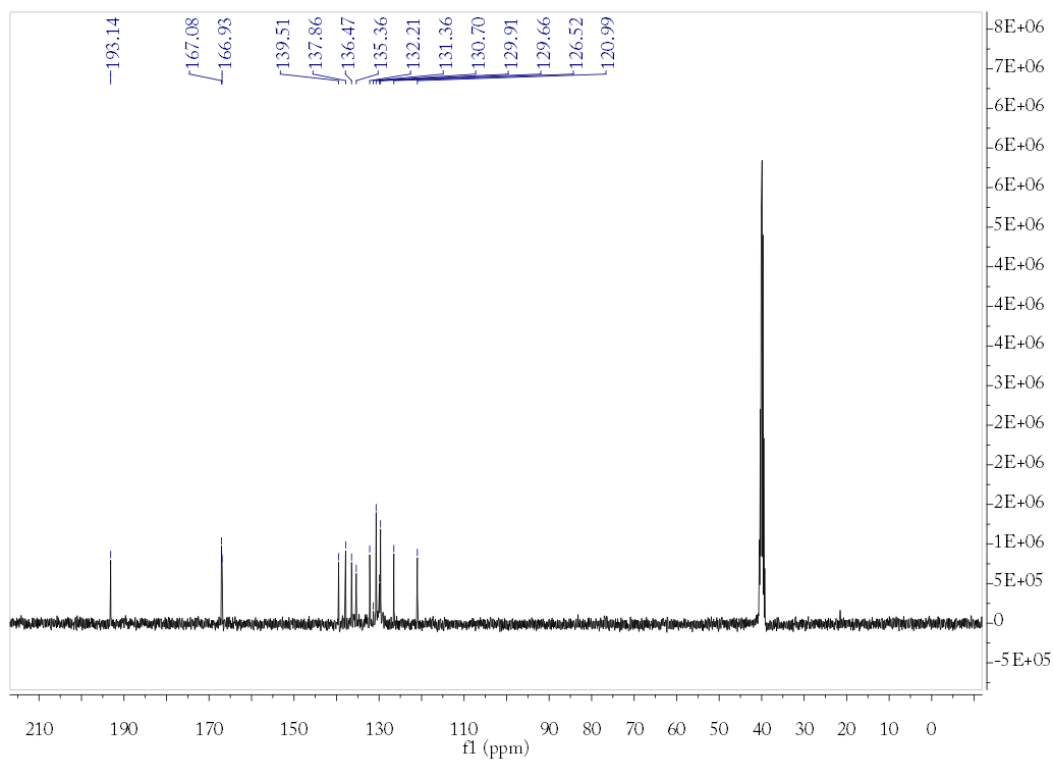

The spectra of  $^1\text{H}$  and  $^{13}\text{C}$  NMR of compound **2c**



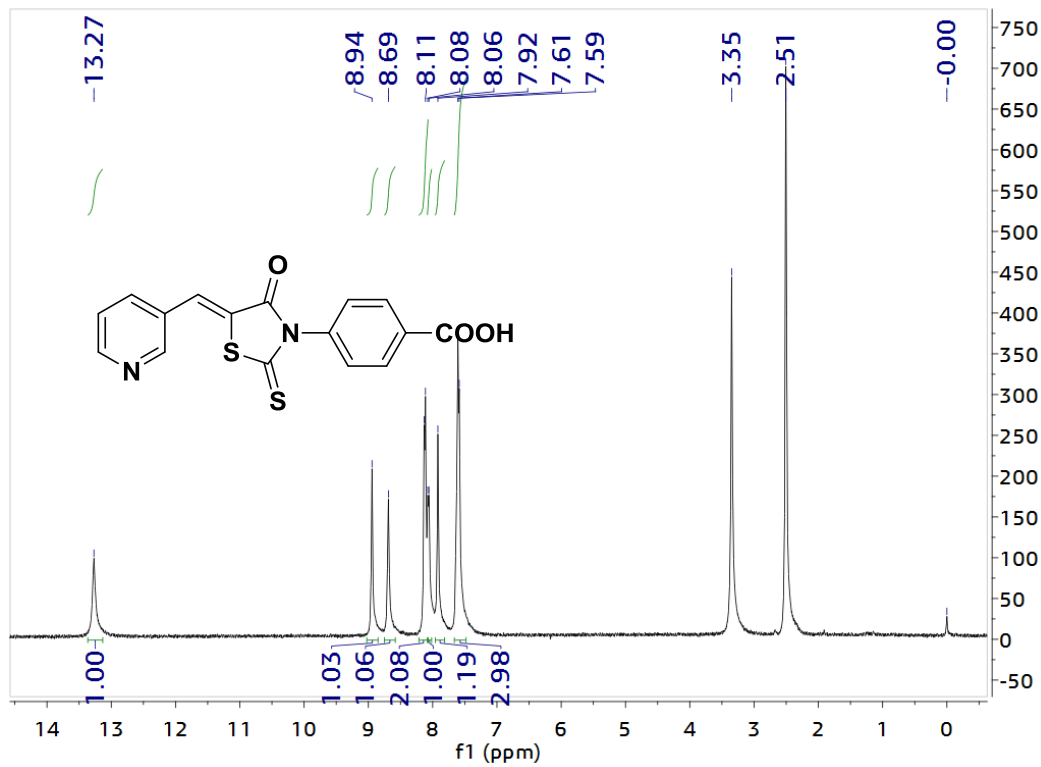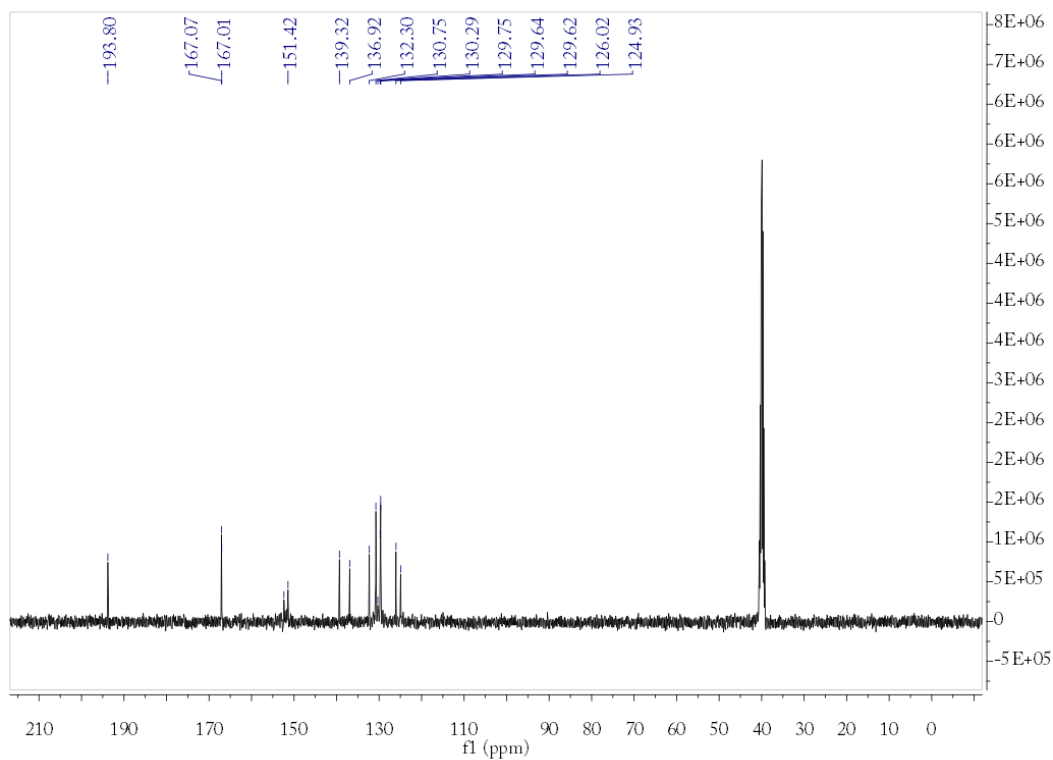

The spectra of  $^1\text{H}$  and  $^{13}\text{C}$  NMR of compound **2d**

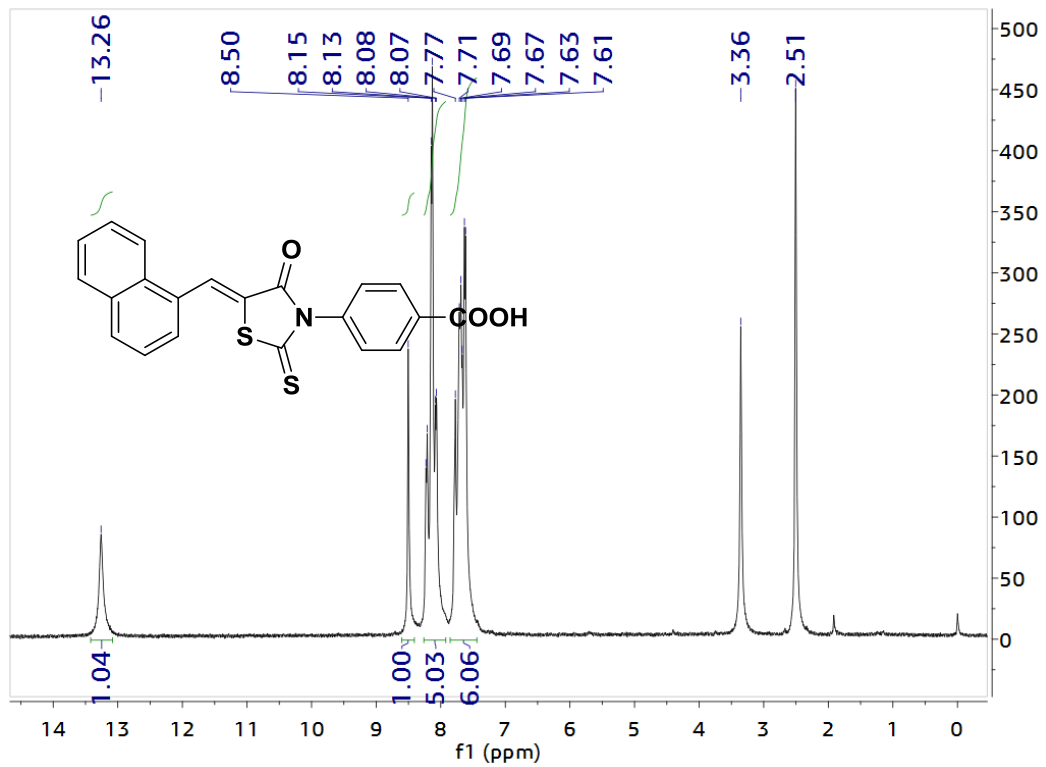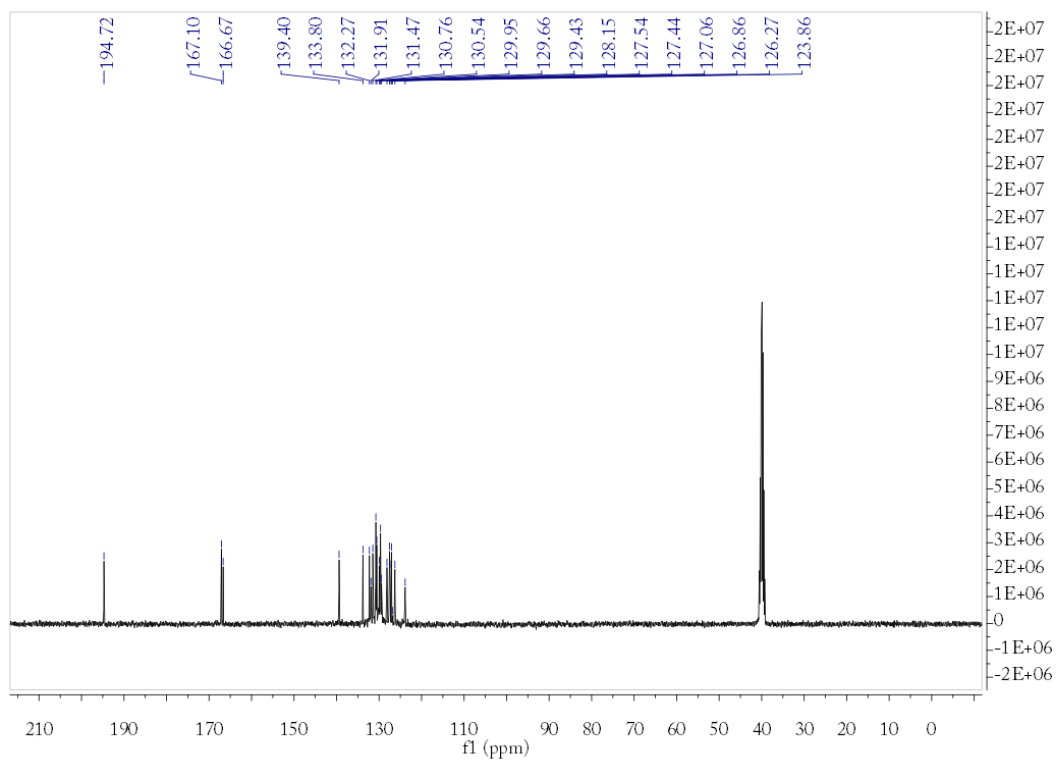

The spectra of <sup>1</sup>H and <sup>13</sup>C NMR of compound 2e

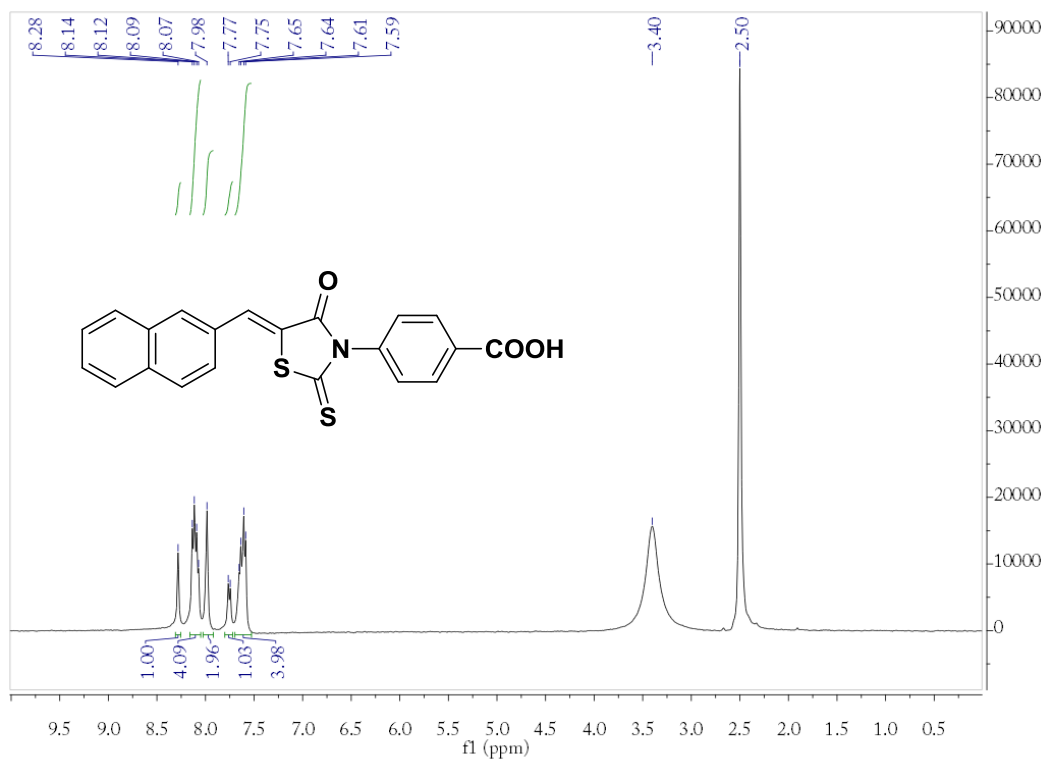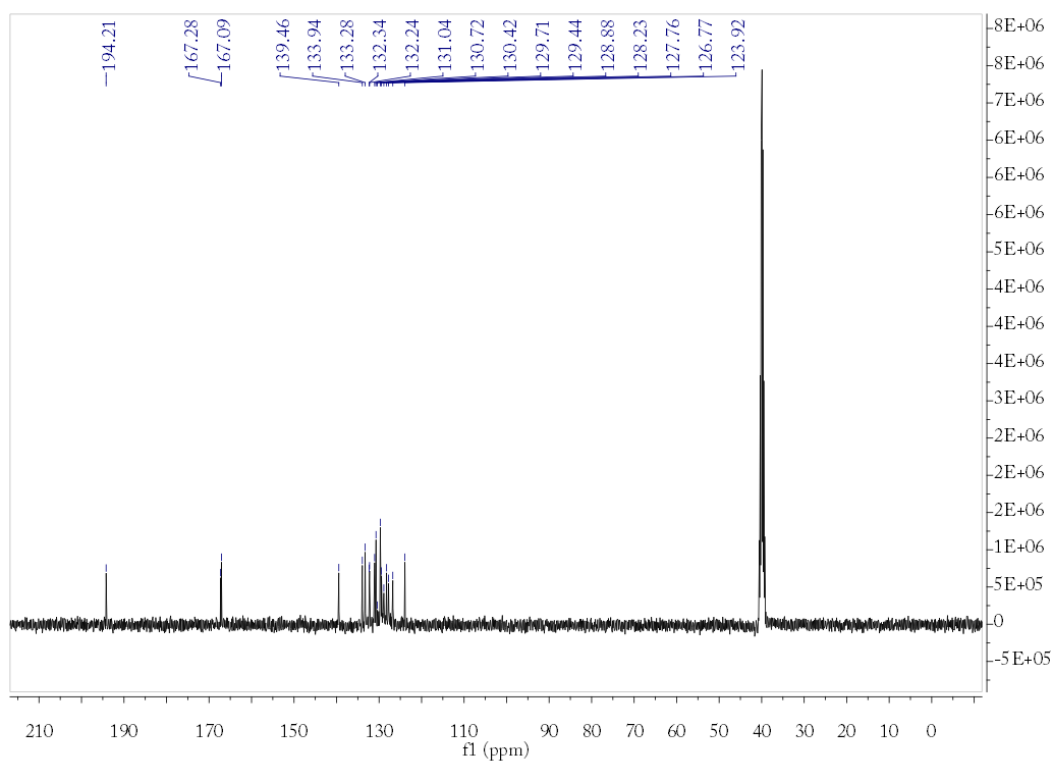

The spectra of <sup>1</sup>H and <sup>13</sup>C NMR of compound **2f**

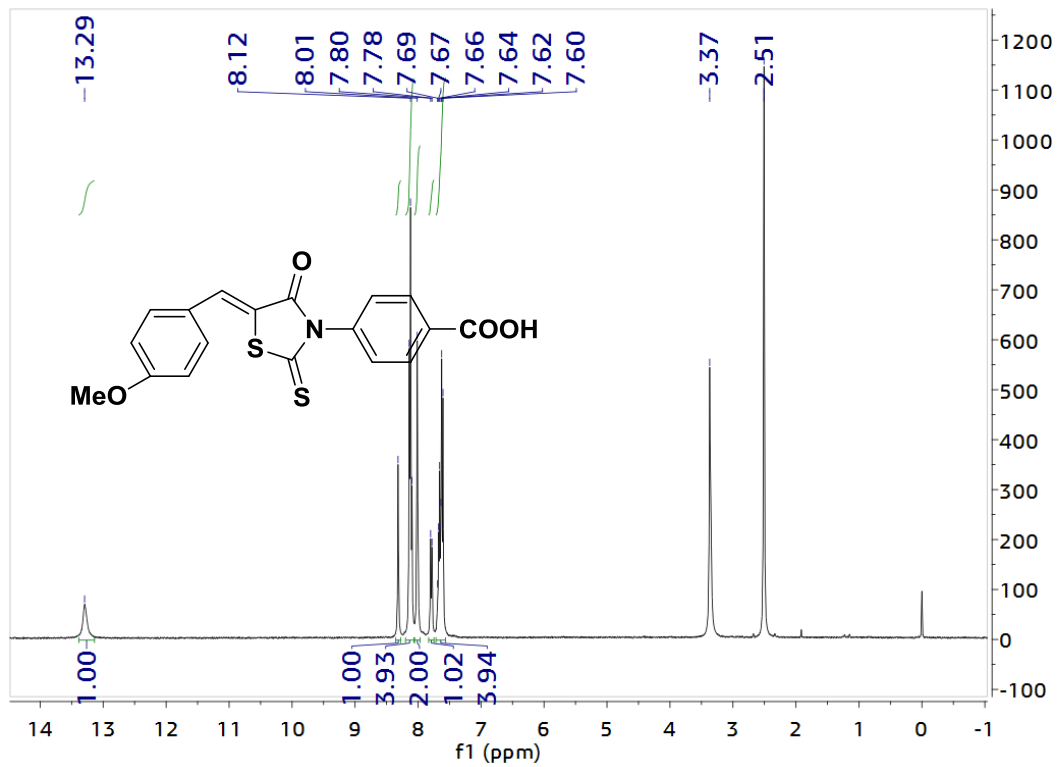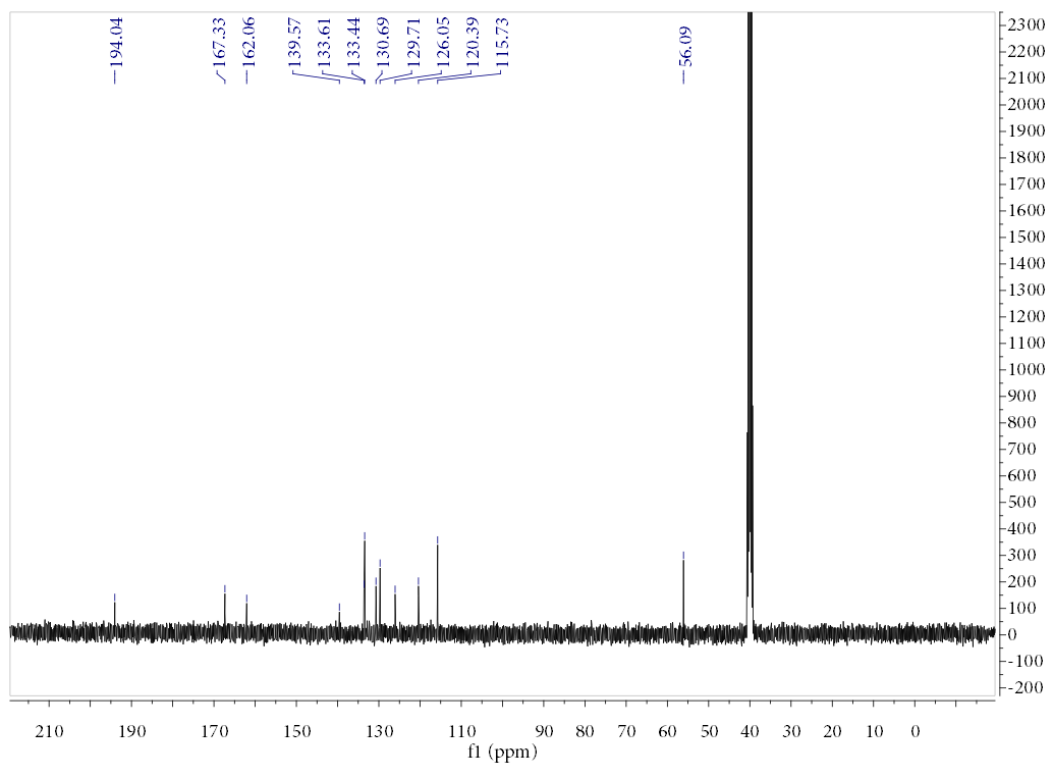

The spectra of  $^1\text{H}$  and  $^{13}\text{C}$  NMR of compound **2g**

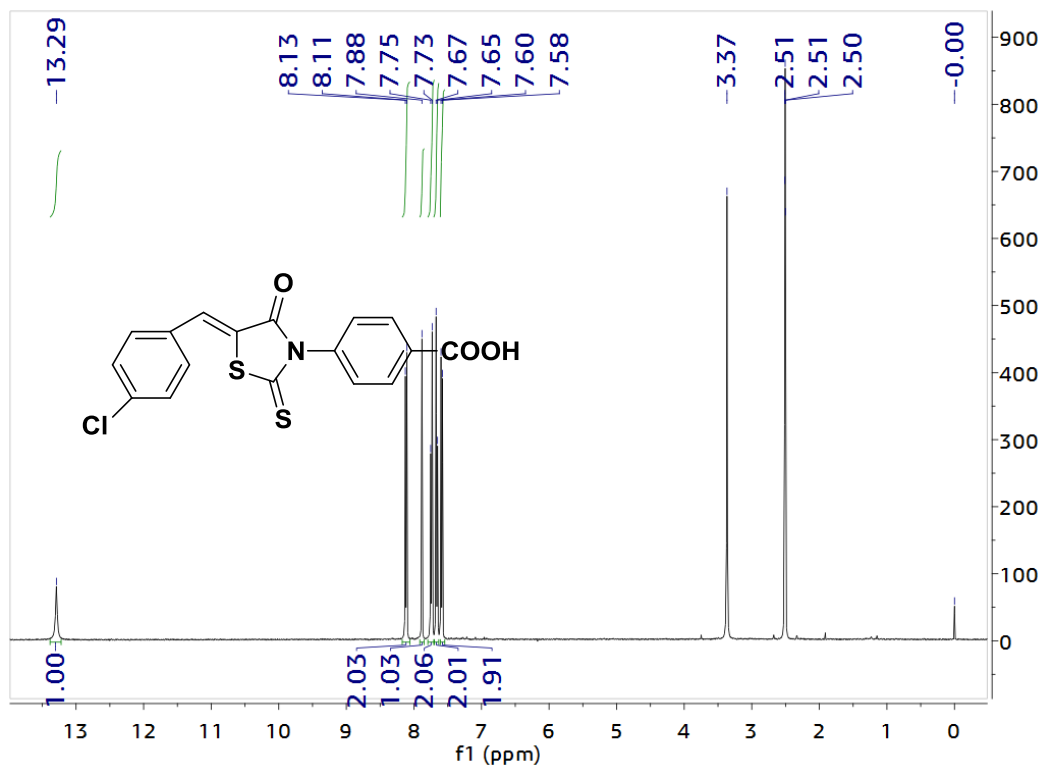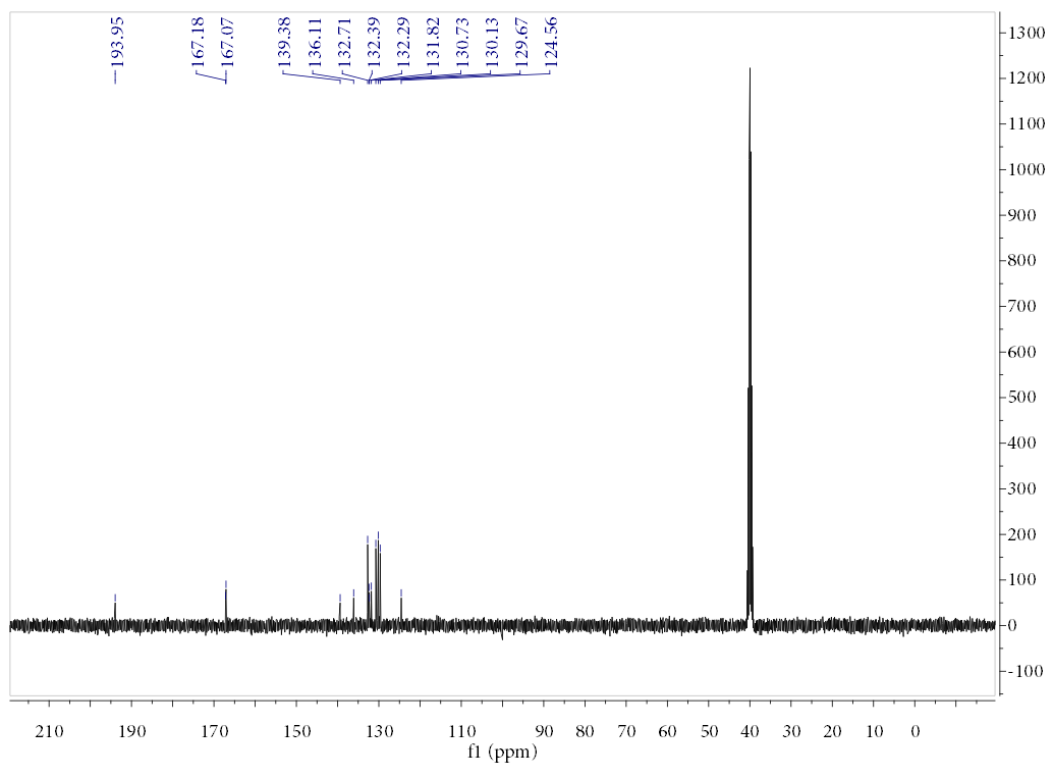

The spectra of <sup>1</sup>H and <sup>13</sup>C NMR of compound 2h

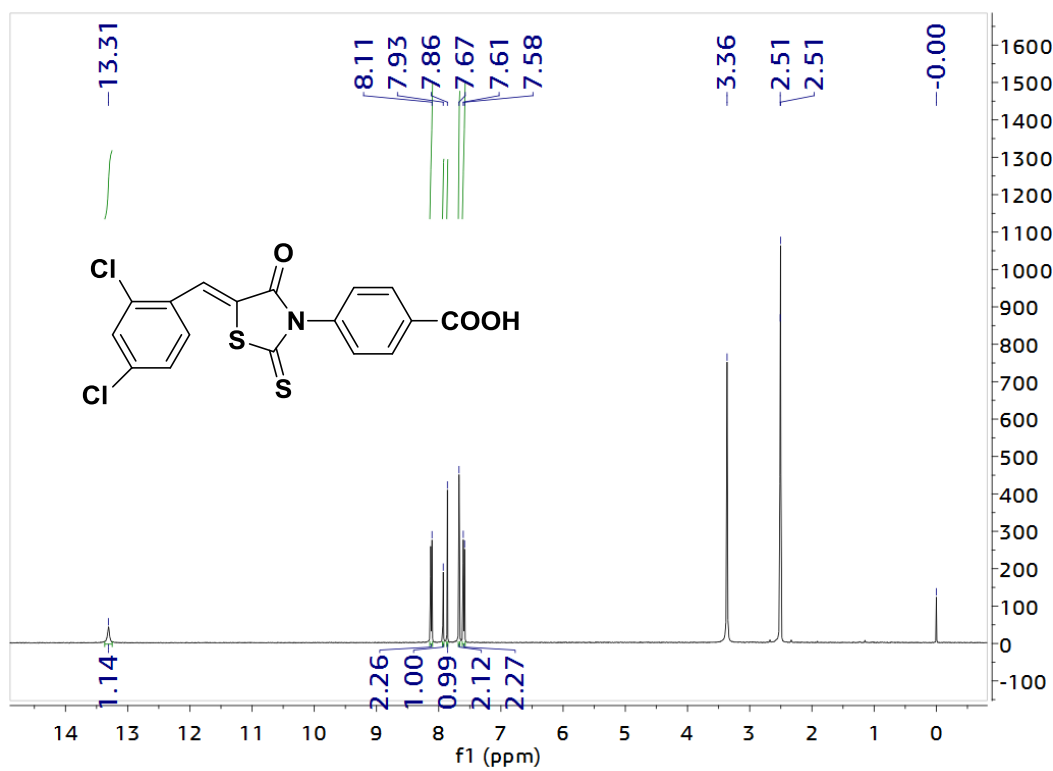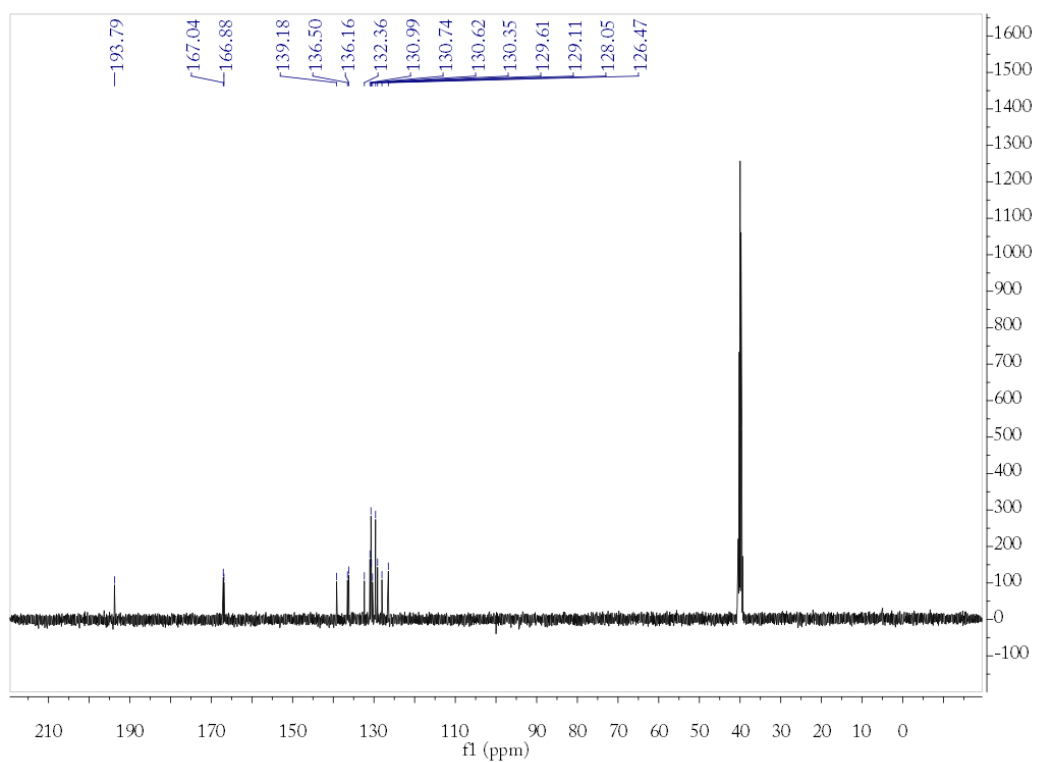

The spectra of  $^1\text{H}$  and  $^{13}\text{C}$  NMR of compound **2i**

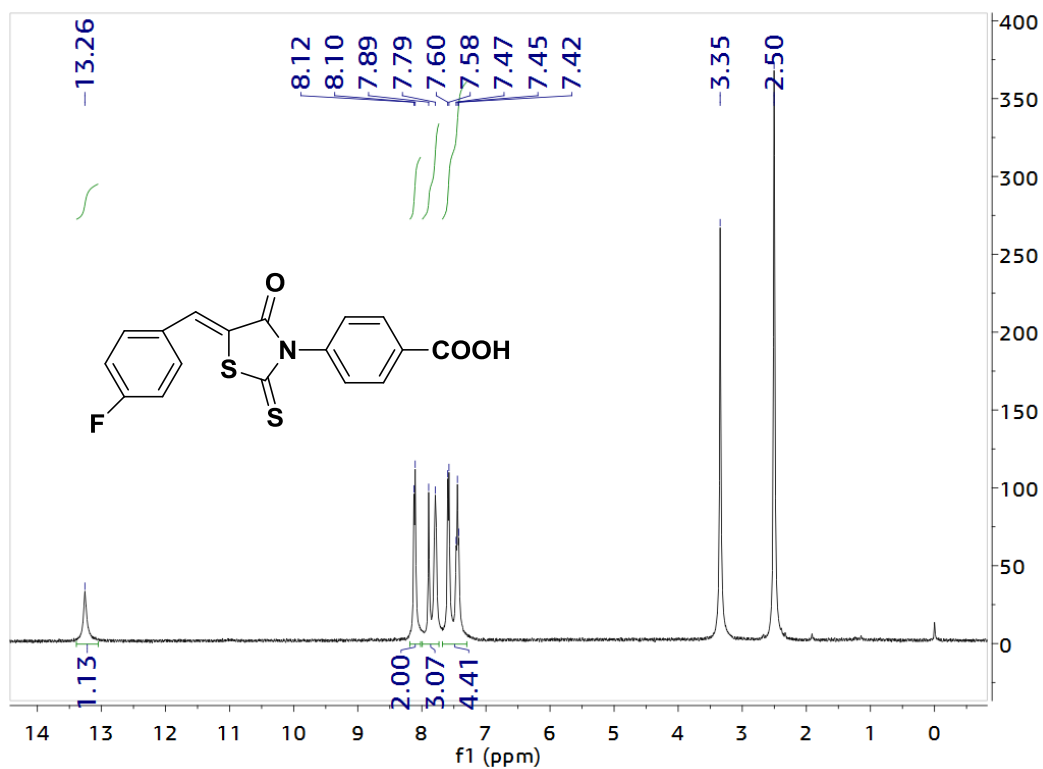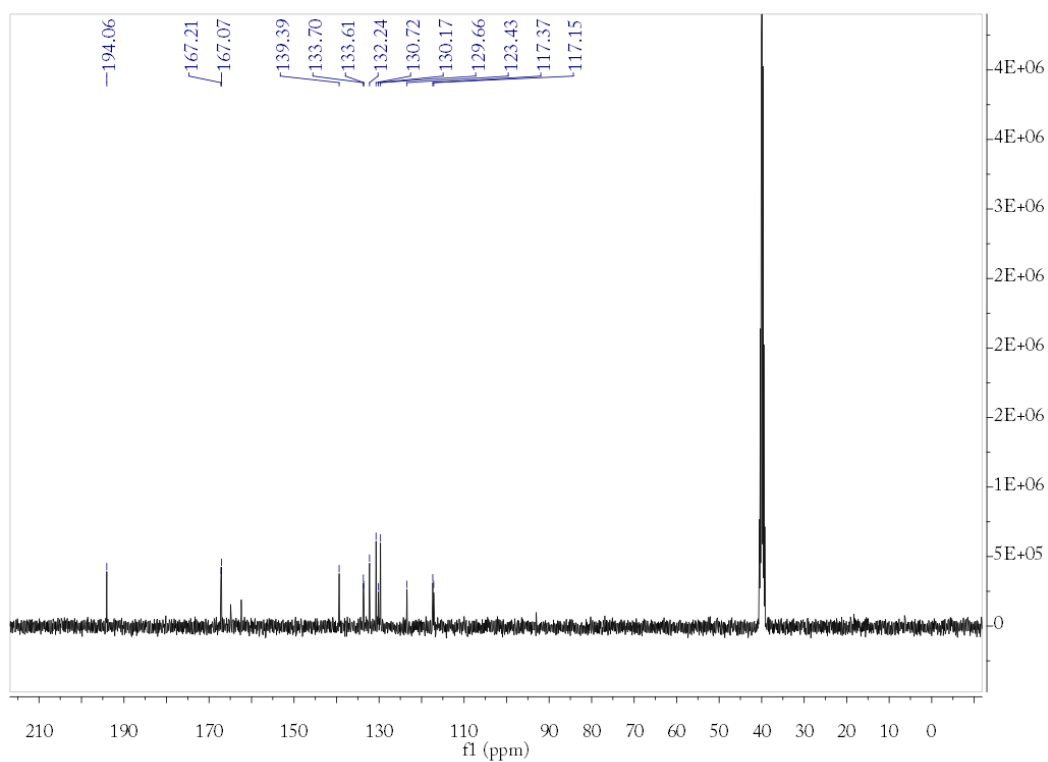

The spectra of  $^1\text{H}$  and  $^{13}\text{C}$  NMR of compound 2j

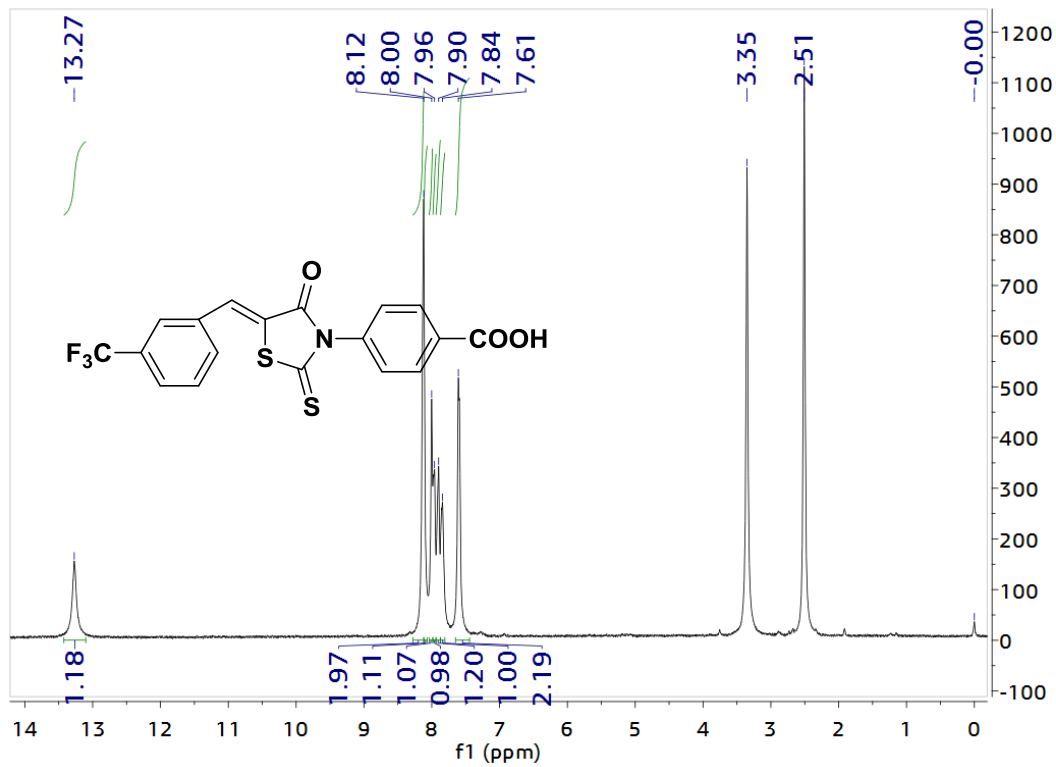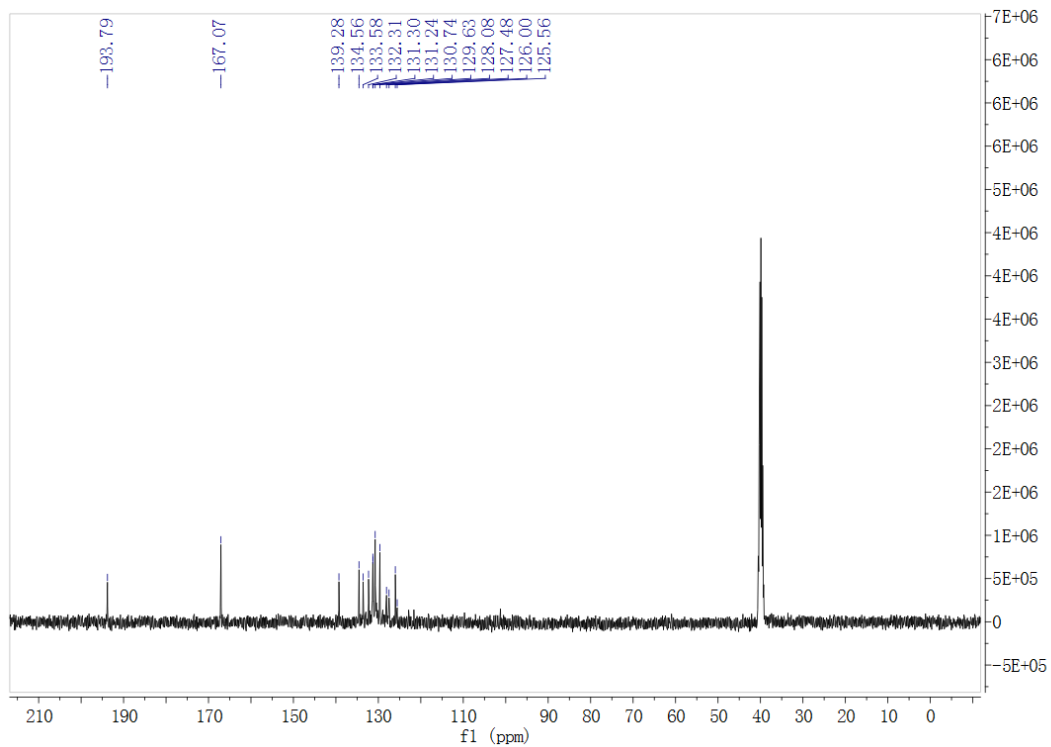

The spectra of  $^1\text{H}$  and  $^{13}\text{C}$  NMR of compound **2k**



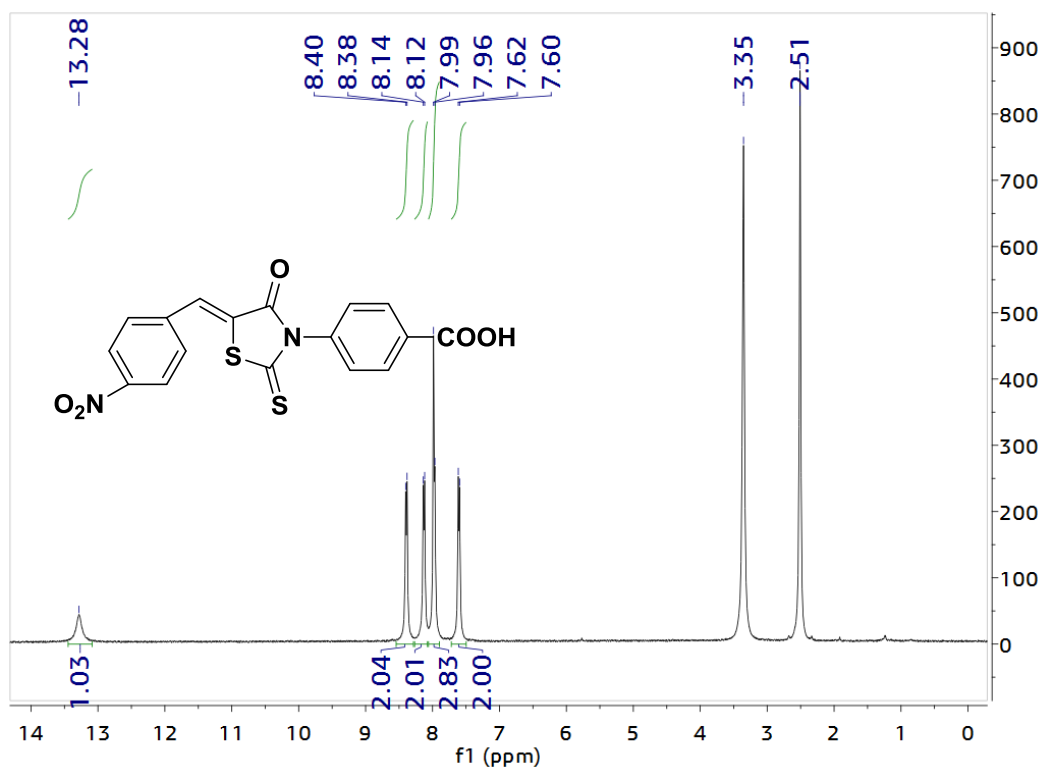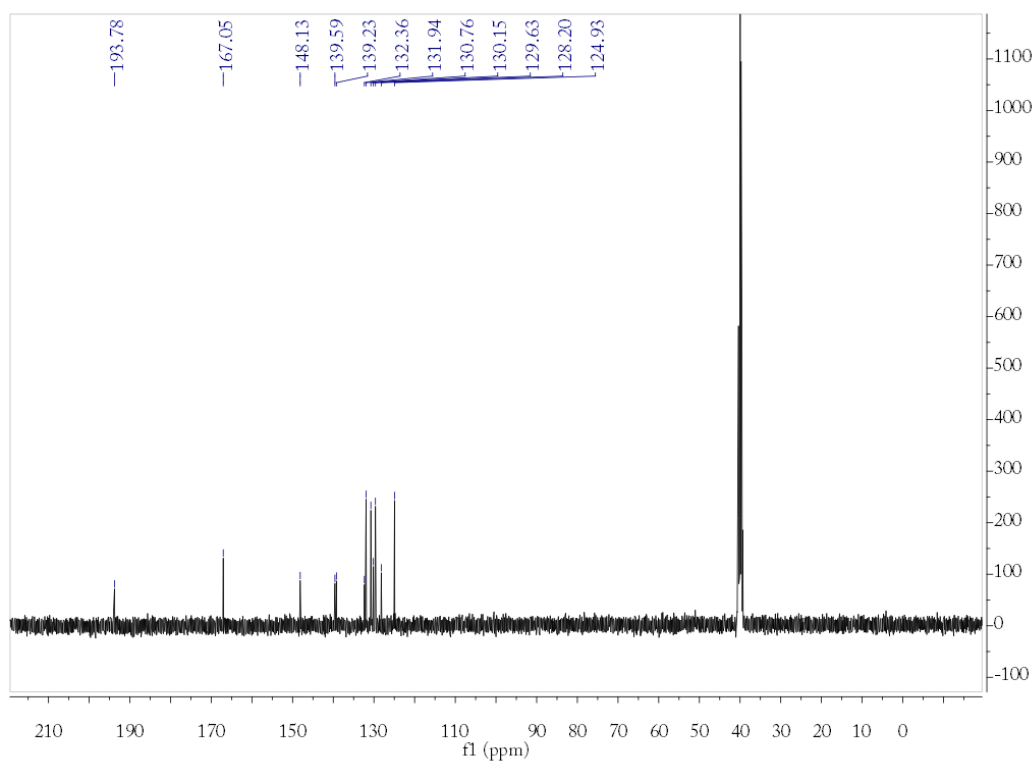

The spectra of  $^1\text{H}$  and  $^{13}\text{C}$  NMR of compound **2I**

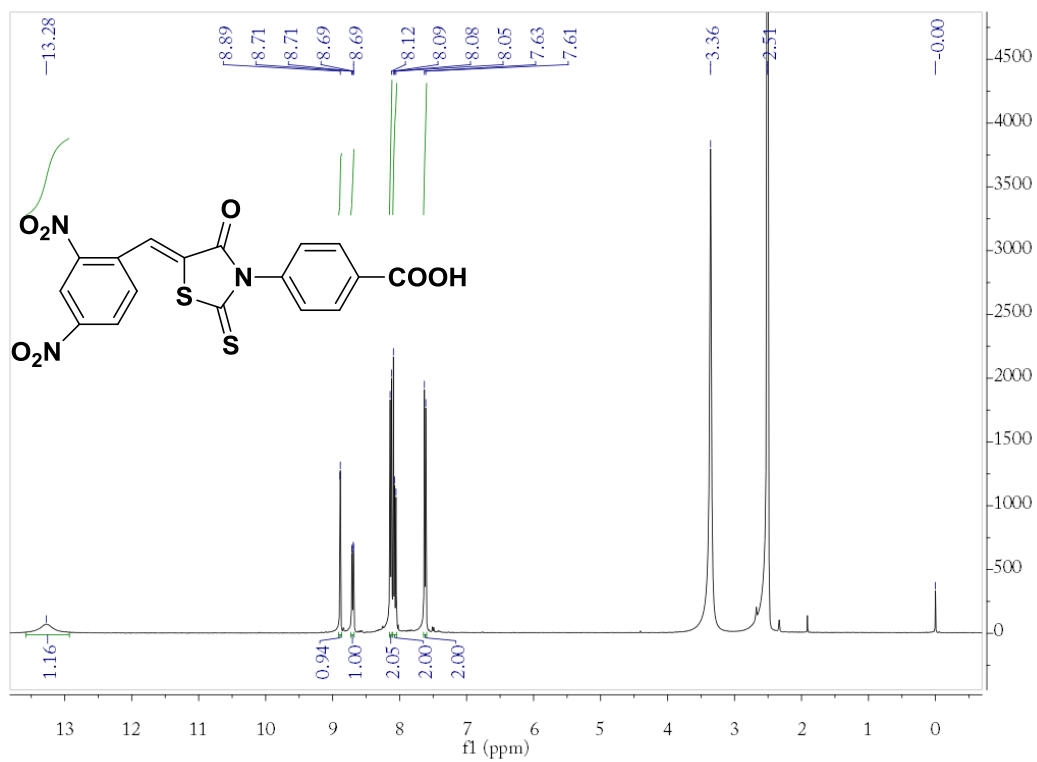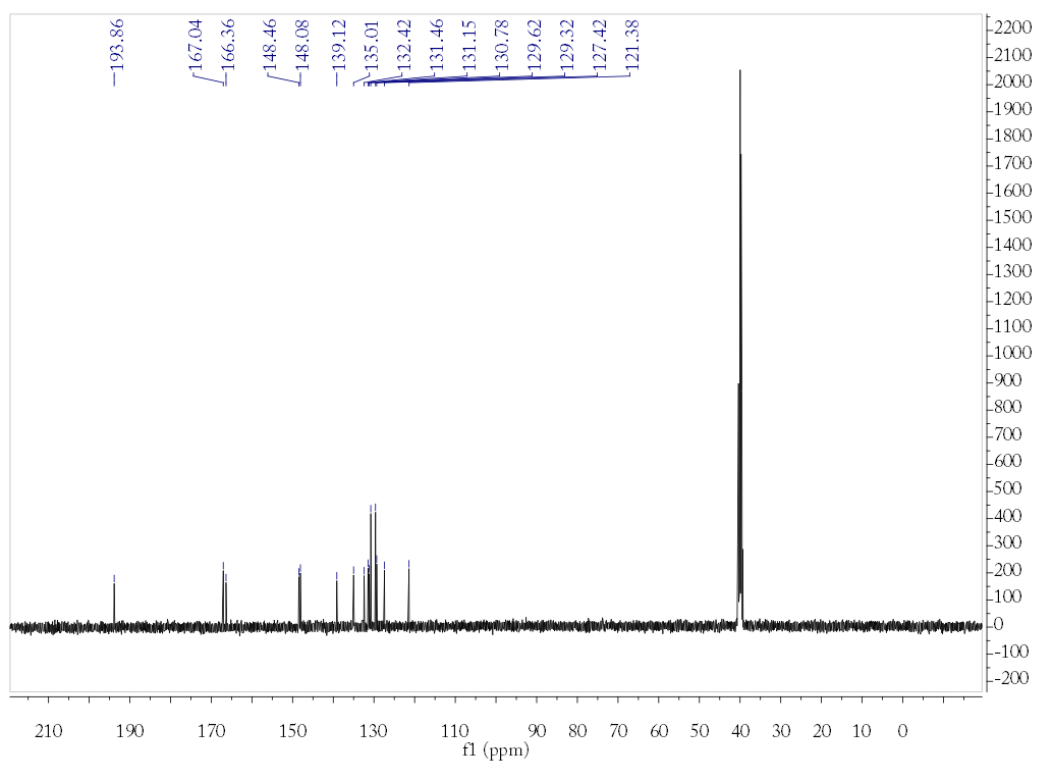

The spectra of  $^1\text{H}$  and  $^{13}\text{C}$  NMR of compound **2m**

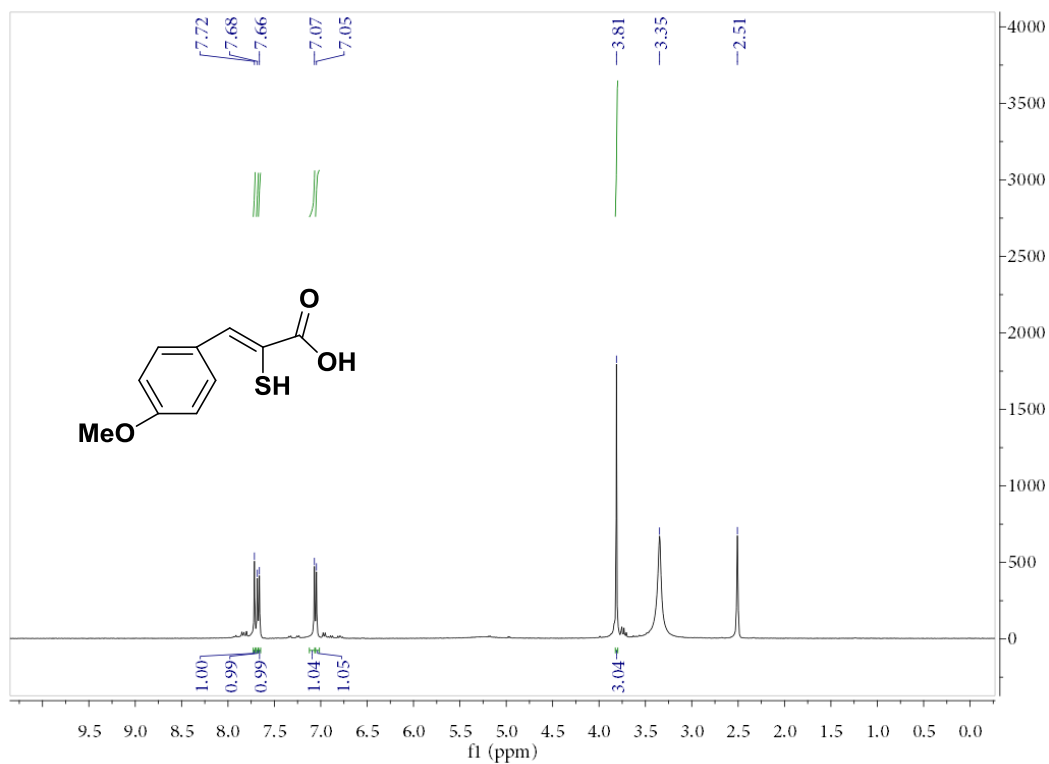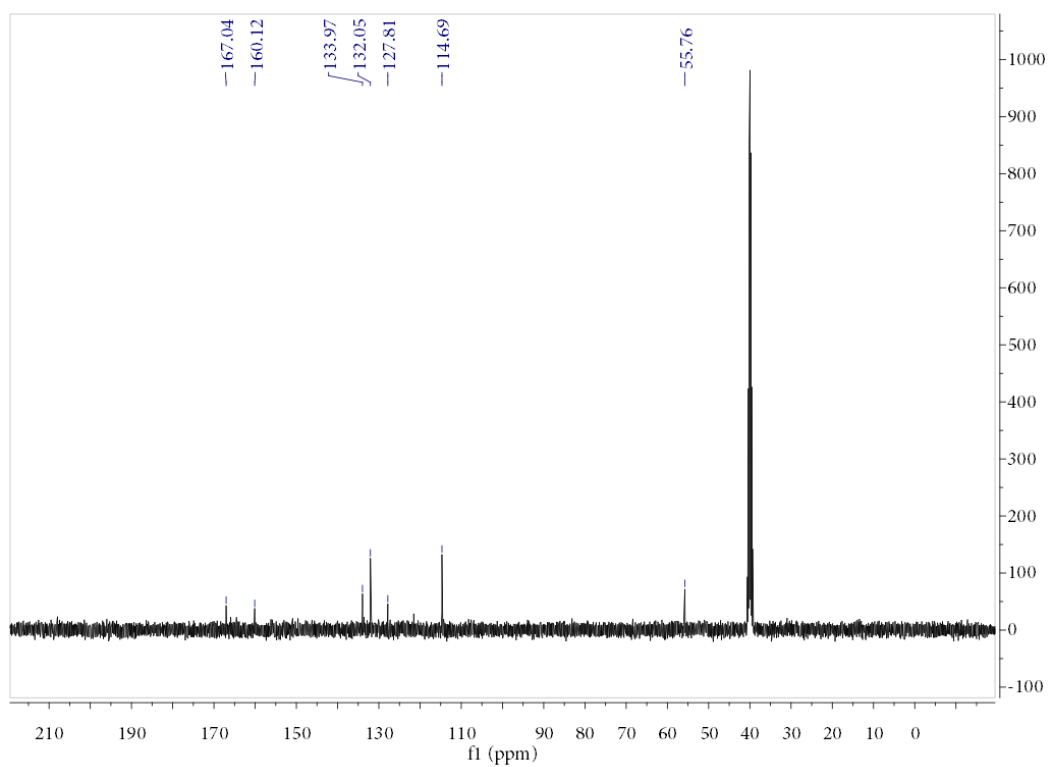

The spectra of  $^1\text{H}$  and  $^{13}\text{C}$  NMR of compound **3a**
